# Supplementary material for: Relationship between Vaccine Application and Climate Factors in Sheep and Goat Farms in Greece
Source: MDPI journal article supplement (doi:10.3390/vaccines11040797), 2023-04-04
Supplement: s1 [file s1]

# Relationship between Vaccine Application and Climate Factors in Sheep and Goat Farms in Greece

Eleni I. Katsarou and George C. Fthenakis

**Table S1.** Details of multivariable models ( $n = 62$ ) employed for the evaluation of potential associations with optional vaccinations in 444 small ruminant farms in Greece.

| Outcome                                                                          | Variables                                    |                                                                                                        |
|----------------------------------------------------------------------------------|----------------------------------------------|--------------------------------------------------------------------------------------------------------|
|                                                                                  | offered to the multi-variable models ( $n$ ) | required in the final models                                                                           |
| Vaccination against chlamydial abortion – sheep – 10-year average                | 7                                            | (a) minimum temperature at 2 m, (b) relative humidity at 2 m, (c) wind speed at 10 m                   |
| Vaccination against chlamydial abortion – sheep – 2-year average                 | 7                                            | (a) minimum temperature at 2 m, (b) relative humidity at 2 m, (c) wind speed at 10 m                   |
| Vaccination against chlamydial abortion – goats – 10-year average                | 7                                            | (a) precipitation                                                                                      |
| Vaccination against chlamydial abortion – goats – 2-year average                 | 7                                            | (a) wind speed at 10 m                                                                                 |
| Vaccination against chlamydial abortion – I & s-I <sup>1</sup> – 10-year average | 0                                            | n/a                                                                                                    |
| Vaccination against chlamydial abortion – I & s-I – 2-year average               | 0                                            | n/a                                                                                                    |
| Vaccination against chlamydial abortion – s-E & E – 10-year average              | 8                                            | (a) temperature at 2 m, (b) relative humidity at 2 m, (c) wind speed at 10 m                           |
| Vaccination against chlamydial abortion – s-E & E – 2-year average               | 7                                            | (a) precipitation, (b) wind speed at 10 m                                                              |
| Vaccination against clostridial infections – sheep – 10-year average             | 8                                            | (a) temperature of Earth skin, (b) temperature at 2 m, (c) relative humidity at 2 m, (d) precipitation |
| Vaccination against clostridial infections – sheep – 2-year average              | 8                                            | (a) temperature of Earth skin, (b) temperature at 2 m, (c) relative humidity at 2 m, (d) precipitation |
| Vaccination against clostridial infections – goats – 10-year average             | 1                                            | (a) relative humidity at 2 m                                                                           |
| Vaccination against clostridial infections – goats – 2-year average              | 2                                            | (a) relative humidity at 2 m                                                                           |
| Vaccination against clostridial infections – I & s-I – 10-year average           | 0                                            | n/a                                                                                                    |
| Vaccination against clostridial infections – I & s-I – 2-year average            | 0                                            | n/a                                                                                                    |

|                                                                        |   |                                                                                                                            |
|------------------------------------------------------------------------|---|----------------------------------------------------------------------------------------------------------------------------|
| Vaccination against clostridial infections – s-E & E – 10-year average | 8 | (a) temperature of Earth skin, (b) temperature at 2 m, (c) wind speed at 10 m                                              |
| Vaccination against clostridial infections – s-E & E – 2-year average  | 7 | (a) precipitation                                                                                                          |
| Vaccination against contagious agalactia – sheep – 10-year average     | 8 | (a) relative humidity at 2 m, (b) wind speed at 10 m                                                                       |
| Vaccination against contagious agalactia – sheep – 2-year average      | 7 | (a) relative humidity at 2 m, (b) wind speed at 10 m                                                                       |
| Vaccination against contagious agalactia – goats – 10-year average     | 7 | (a) precipitation, (b) wind speed at 10 m                                                                                  |
| Vaccination against contagious agalactia – goats – 2-year average      | 7 | (a) maximum temperature at 2 m, (b) wind speed at 10 m                                                                     |
| Vaccination against contagious agalactia – I & s-I – 10-year average   | 7 | (a) wind speed at 10 m                                                                                                     |
| Vaccination against contagious agalactia – I & s-I – 2-year average    | 6 | (a) temperature at 2 m, (b) minimum temperature at 2 m, (c) relative humidity at 2 m, (d) wind speed at 10 m               |
| Vaccination against contagious agalactia – s-E & E – 10-year average   | 8 | (a) temperature at 2 m, (b) maximum temperature at 2 m, (c) temperature range at 2 m                                       |
| Vaccination against contagious agalactia – s-E & E – 2-year average    | 7 | (a) temperature at 2 m, (b) minimum temperature at 2 m, (c) temperature range at 2 m                                       |
| Vaccination against contagious ecthyma – sheep – 10-year average       | 6 | (a) maximum temperature at 2 m, (b) minimum temperature at 2 m, (c) temperature range at 2 m, (d) relative humidity at 2 m |
| Vaccination against contagious ecthyma – sheep – 2-year average        | 5 | (a) temperature of Earth skin, (b) temperature at 2 m, (c) maximum temperature at 2 m, (d) minimum temperature at 2 m,     |
| Vaccination against contagious ecthyma – goats – 10-year average       | 0 | n/a                                                                                                                        |
| Vaccination against contagious ecthyma – goats – 2-year average        | 5 | (a) wind speed at 10 m                                                                                                     |
| Vaccination against contagious ecthyma – I & s-I – 10-year average     | 6 | (a) temperature at 2 m                                                                                                     |
| Vaccination against contagious ecthyma – I & s-I – 2-year average      | 5 | (a) temperature of Earth skin, (b) temperature at 2 m                                                                      |
| Vaccination against contagious ecthyma – s-E & E – 10-year average     | 6 | (a) temperature of Earth skin, (b) maximum temperature at 2 m, (c) temperature range at 2 m                                |
| Vaccination against contagious ecthyma – s-E & E – 2-year average      | 8 | (a) temperature at 2 m, (b) maximum temperature at 2 m, (c) minimum temperature at 2 m, (d) temperature range at 2 m       |
| Vaccination against foot-rot – sheep – 10-year average                 | 0 | n/a                                                                                                                        |
| Vaccination against foot-rot – sheep – 2-year average                  | 1 | --                                                                                                                         |

|                                                                  |   |                                                                                                                                             |
|------------------------------------------------------------------|---|---------------------------------------------------------------------------------------------------------------------------------------------|
| Vaccination against foot-rot – goats – 10-year average           | 0 | n/a                                                                                                                                         |
| Vaccination against foot-rot – goats – 2-year average            | 0 | n/a                                                                                                                                         |
| Vaccination against foot-rot – I & s-I – 10-year average         | 0 | n/a                                                                                                                                         |
| Vaccination against foot-rot – I & s-I – 2-year average          | 1 | (a) relative humidity at 2 m                                                                                                                |
| Vaccination against foot-rot – s-E & E – 10-year average         | 8 | (a) maximum temperature at 2 m, (b) minimum temperature at 2 m, (c) temperature range at 2 m                                                |
| Vaccination against foot-rot – s-E & E – 2-year average          | 8 | (a) maximum temperature at 2 m, (b) minimum temperature at 2 m, (c) temperature range at 2 m                                                |
| Vaccination against paratuberculosis – sheep – 10-year average   | 4 | (a) temperature of Earth skin, (b) temperature at 2 m                                                                                       |
| Vaccination against paratuberculosis – sheep – 2-year average    | 4 | (a) temperature of Earth skin, (b) temperature at 2 m                                                                                       |
| Vaccination against paratuberculosis – goats – 10-year average   | 1 | (a) maximum temperature at 2 m                                                                                                              |
| Vaccination against paratuberculosis – goats – 2-year average    | 1 | (a) maximum temperature at 2 m                                                                                                              |
| Vaccination against paratuberculosis – I & s-I – 10-year average | 5 | (a) minimum temperature at 2 m, (b) relative humidity at 2 m                                                                                |
| Vaccination against paratuberculosis – I & s-I – 2-year average  | 5 | (a) temperature of Earth skin, (b) temperature at 2 m, (c) minimum temperature at 2 m                                                       |
| Vaccination against paratuberculosis – s-E & E – 10-year average | 2 | (a) maximum temperature at 2 m                                                                                                              |
| Vaccination against paratuberculosis – s-E & E – 2-year average  | 2 | (a) maximum temperature at 2 m                                                                                                              |
| Vaccination against pneumonia – sheep – 10-year average          | 2 | (a) maximum temperature at 2 m, (b) relative humidity at 2 m                                                                                |
| Vaccination against pneumonia – sheep – 2-year average           | 2 | (a) temperature range at 2 m, (b) relative humidity at 2 m                                                                                  |
| Vaccination against pneumonia – goats – 10-year average          | 5 | (a) minimum temperature at 2 m, (b) temperature range at 2 m, (c) relative humidity at 2 m, (d) precipitation                               |
| Vaccination against pneumonia – goats – 2-year average           | 5 | (a) minimum temperature at 2 m, (b) temperature range at 2 m, (c) relative humidity at 2 m                                                  |
| Vaccination against pneumonia – I & s-I – 10-year average        | 6 | (a) temperature of Earth skin, (b) temperature at 2 m, (c) maximum temperature at 2 m                                                       |
| Vaccination against pneumonia – I & s-I – 2-year average         | 7 | (a) temperature of Earth skin, (b) temperature at 2 m, (c) maximum temperature at 2 m, (d) relative humidity at 2 m, (e) wind speed at 10 m |
| Vaccination against pneumonia – s-E & E – 10-year average        | 1 | (a) relative humidity at 2 m                                                                                                                |

|                                                                            |   |                                                                                                                            |
|----------------------------------------------------------------------------|---|----------------------------------------------------------------------------------------------------------------------------|
| Vaccination against pneumonia – s-E & E – 2-year average                   | 2 | (a) relative humidity at 2 m                                                                                               |
| Vaccination against staphylococcal mastitis – sheep – 10-year average      | 4 | (a) wind speed at 10 m                                                                                                     |
| Vaccination against staphylococcal mastitis – sheep – 2-year average       | 4 | (a) temperature range at 2 m, (b) wind speed at 10 m                                                                       |
| Vaccination against staphylococcal mastitis – goats – 10-year average      | 4 | (a) wind speed at 10 m                                                                                                     |
| Vaccination against staphylococcal mastitis – goats – 2-year average       | 4 | (a) temperature at 2 m, (b) minimum temperature at 2 m, (c) wind speed at 10 m                                             |
| Vaccination against staphylococcal mastitis – I & s-I – 10-year average    | 1 | (a) minimum temperature at 2 m                                                                                             |
| Vaccination against staphylococcal mastitis – I & s-I – 2-year average     | 1 | (a) precipitation                                                                                                          |
| Vaccination against staphylococcal mastitis – s-E & E – 10-year average    | 5 | (a) temperature of Earth skin, (b) temperature at 2 m, (c) precipitation, (d) wind speed at 10 m                           |
| Vaccination against staphylococcal mastitis – s-E & E – 2-year average     | 5 | (a) temperature of Earth skin, (b) temperature at 2 m, (c) precipitation, (d) wind speed at 10 m                           |
| Total number of optional vaccines administered – sheep – 10-year average   | 7 | (a) temperature of Earth skin (b) maximum temperature at 2 m, (c) minimum temperature at 2 m, (d) temperature range at 2 m |
| Total number of optional vaccines administered – sheep – 2-year average    | 7 | (a) temperature of Earth skin (b) maximum temperature at 2 m, (c) minimum temperature at 2 m, (d) wind speed at 10 m       |
| Total number of optional vaccines administered – goats – 10-year average   | 6 | (a) temperature at 2 m, (b) maximum temperature at 2 m, (c) temperature range at 2 m                                       |
| Total number of optional vaccines administered – goats – 2-year average    | 6 | (a) temperature at 2 m, (b) maximum temperature at 2 m, (c) maximum temperature at 2 m, (d) temperature range at 2 m       |
| Total number of optional vaccines administered – I & s-I – 10-year average | 2 | --                                                                                                                         |
| Total number of optional vaccines administered – I & s-I – 2-year average  | 0 | n/a                                                                                                                        |
| Total number of optional vaccines administered – s-E & E – 10-year average | 7 | (a) temperature at 2 m, (b) maximum temperature at 2 m, (c) temperature range at 2 m, (d) precipitation                    |
| Total number of optional vaccines administered – s-E & E – 2-year average  | 7 | (a) temperature at 2 m, (b) maximum temperature at 2 m, (c) temperature range at 2 m, (d) precipitation                    |

1 I: intensive, E: extensive, s: semi.

**Table S2.** Details of multivariable models ( $n = 67$ ) employed in the comparative evaluation for potential comparative associations of management-related, human resources-related and climate-related variables with optional vaccinations in 444 small ruminant farms in Greece.

| Outcome                                                                          | Variables                                    |                                                                                                                                                                                                                    |
|----------------------------------------------------------------------------------|----------------------------------------------|--------------------------------------------------------------------------------------------------------------------------------------------------------------------------------------------------------------------|
|                                                                                  | offered to the multi-variable models ( $n$ ) | required in the final models                                                                                                                                                                                       |
| Vaccination against chlamydial abortion – sheep – 10-year average                | 3                                            | (a) Age of newborns when taken away from dam, (b) Daily number of milking sessions, (c) Wind speed at 10 m                                                                                                         |
| Vaccination against chlamydial abortion – sheep – 2-year average                 | 3                                            | (a) Age of newborns when taken away from dam, (b) Daily number of milking sessions, (c) Wind speed at 10 m                                                                                                         |
| Vaccination against chlamydial abortion – goats – 10-year average                | 6                                            | (a) Age of newborns when taken away from dam, (b) Daily number of milking sessions, (c) Wind speed at 10 m                                                                                                         |
| Vaccination against chlamydial abortion – goats – 2-year average                 | 6                                            | (a) Breed of animals in the farm, (b) Average age of culling female animals, (c) Age of newborns when taken away from dam, (d) Daily number of milking sessions, (e) Daily period spent by farmer at the farm      |
| Vaccination against chlamydial abortion – I & s-I <sup>1</sup> – 10-year average | 5                                            | (a) Age of newborns when taken away from dam, (b) Daily number of milking sessions,                                                                                                                                |
| Vaccination against chlamydial abortion – I & s-I – 2-year average               | 5                                            | (a) Age of newborns when taken away from dam, (b) Daily number of milking sessions,                                                                                                                                |
| Vaccination against chlamydial abortion – s-E & E – 10-year average              | 8                                            | (a) Average age of culling female animals, (b) Age of newborns when taken away from dam, (c) Daily period spent by farmer at the farm, (d) Temperature at 2m, (e) Relative humidity at 2 m, (f) Wind speed at 10 m |
| Vaccination against chlamydial abortion – s-E & E – 2-year average               | 7                                            | (a) Average age of culling female animals, (b) Age of newborns when taken away from dam, (c) Daily period spent by farmer at the farm, (d) Precipitation, (e) Wind speed at 10 m                                   |
| Vaccination against clostridial infections – sheep – 10-year average             | 7                                            | (a) Age of farmers, (b) Family tradition in farming, (c) temperature of Earth skin, (d) temperature at 2 m, (e) relative humidity at 2 m, (f) precipitation                                                        |
| Vaccination against clostridial infections – sheep – 2-year average              | 6                                            | (a) Management system applied in the farm, (b) Age of farmers, (c) Family tradition in farming, (d) temperature of Earth skin, (e) temperature at 2 m, (f) relative humidity at 2 m                                |
| Vaccination against clostridial infections – goats – 10-year average             | 1                                            | (a) Family tradition in farming                                                                                                                                                                                    |
| Vaccination against clostridial infections – goats – 2-year average              | 1                                            | (a) Family tradition in farming                                                                                                                                                                                    |
| Vaccination against clostridial infections – I & s-I – 10-year average           | 2                                            | (a) Family tradition in farming                                                                                                                                                                                    |

|                                                                        |   |                                                                                                                                                                                              |
|------------------------------------------------------------------------|---|----------------------------------------------------------------------------------------------------------------------------------------------------------------------------------------------|
| Vaccination against clostridial infections – I & s-I – 2-year average  | 2 | (a) Family tradition in farming                                                                                                                                                              |
| Vaccination against clostridial infections – s-E & E – 10-year average | 5 | (a) Age of farmers, (b) Family tradition in farming, (c) temperature of Earth skin, (d) temperature at 2 m, (e) wind speed at 10 m                                                           |
| Vaccination against clostridial infections – s-E & E – 2-year average  | 2 | (a) Family tradition in farming                                                                                                                                                              |
| Vaccination against contagious agalactia – sheep – 10-year average     | 5 | (a) Management system applied in the farm, (b) Collaboration with a veterinarian, (c) Duration of dry-period, (d) Relative humidity at 2 m, (e) Wind speed at 10 m                           |
| Vaccination against contagious agalactia – sheep – 2-year average      | 5 | (a) Management system applied in the farm, (b) Collaboration with a veterinarian, (c) Duration of dry-period, (d) Relative humidity at 2 m, (e) Wind speed at 10 m                           |
| Vaccination against contagious agalactia – goats – 10-year average     | 3 | (a) Collaboration with a veterinarian, (b) Use of laboratory diagnostic examinations in samples of milk, (c) Wind speed at 10 m                                                              |
| Vaccination against contagious agalactia – goats – 2-year average      | 4 | (a) Collaboration with a veterinarian, (b) Use of laboratory diagnostic examinations in samples of milk, (c) Wind speed at 10 m                                                              |
| Vaccination against contagious agalactia – I & s-I – 10-year average   | 4 | (a) Use of laboratory diagnostic examinations in samples of milk, (b) Duration of dry-period, (c) Wind speed at 10 m                                                                         |
| Vaccination against contagious agalactia – I & s-I – 2-year average    | 4 | (a) Use of laboratory diagnostic examinations in samples of milk, (b) Wind speed at 10 m                                                                                                     |
| Vaccination against contagious agalactia – s-E & E – 10-year average   | 6 | (a) Collaboration with a veterinarian, (b) Use of laboratory diagnostic examinations in samples of milk, (c) Temperature at 2 m, (d) Maximum temperature at 2m, (e) Temperature range at 2 m |
| Vaccination against contagious agalactia – s-E & E – 2-year average    | 6 | (a) Collaboration with a veterinarian, (b) Use of laboratory diagnostic examinations in samples of milk, (c) Temperature at 2 m, (d) Maximum temperature at 2m, (e) Temperature range at 2 m |
| Vaccination against contagious ecthyma – sheep – 10-year average       | 5 | (a) Farmer's general education, (b) maximum temperature at 2 m, (c) minimum temperature at 2 m, (d) temperature range at 2 m                                                                 |
| Vaccination against contagious ecthyma – sheep – 2-year average        | 5 | (a) Farmer's general education, (b) maximum temperature at 2 m, (c) minimum temperature at 2 m, (d) temperature range at 2 m                                                                 |
| Vaccination against contagious ecthyma – goats – 10-year average       | 0 | n/a                                                                                                                                                                                          |
| Vaccination against contagious ecthyma – goats – 2-year average        | 0 | n/a                                                                                                                                                                                          |

|                                                                    |   |                                                                                                                              |
|--------------------------------------------------------------------|---|------------------------------------------------------------------------------------------------------------------------------|
| Vaccination against contagious ecthyma – I & s-I – 10-year average | 2 | (a) Farmer's general education                                                                                               |
| Vaccination against contagious ecthyma – I & s-I – 2-year average  | 3 | (a) Farmer's general education, (b) temperature at 2 m                                                                       |
| Vaccination against contagious ecthyma – s-E & E – 10-year average | 4 | (a) Average age of culling female animals, (b) Farmer's general education                                                    |
| Vaccination against contagious ecthyma – s-E & E – 2-year average  | 5 | (a) Farmer's general education, (b) maximum temperature at 2 m, (c) minimum temperature at 2 m, (d) temperature range at 2 m |
| Vaccination against foot-rot – sheep – 10-year average             | 1 | (a) Farmer's general education                                                                                               |
| Vaccination against foot-rot – sheep – 2-year average              | 1 | (a) Farmer's general education                                                                                               |
| Vaccination against foot-rot – goats – 10-year average             | 0 | n/a                                                                                                                          |
| Vaccination against foot-rot – goats – 2-year average              | 0 | n/a                                                                                                                          |
| Vaccination against foot-rot – I & s-I – 10-year average           | 1 | (a) Farmer's general education                                                                                               |
| Vaccination against foot-rot – I & s-I – 2-year average            | 2 | (a) Farmer's general education, (b) Relative humidity at 2 m                                                                 |
| Vaccination against foot-rot – s-E & E – 10-year average           | 4 | (a) Farmer's general education, (b) maximum temperature at 2 m, (c) minimum temperature at 2 m, (d) temperature range at 2 m |
| Vaccination against foot-rot – s-E & E – 2-year average            | 1 | (a) Farmer's general education                                                                                               |
| Vaccination against paratuberculosis – sheep – 10-year average     | 0 | n/a                                                                                                                          |
| Vaccination against paratuberculosis – sheep – 2-year average      | 1 | (a) temperature at 2 m                                                                                                       |
| Vaccination against paratuberculosis – goats – 10-year average     | 1 | (a) No. of female animals in the farm                                                                                        |
| Vaccination against paratuberculosis – goats – 2-year average      | 1 | (a) No. of female animals in the farm                                                                                        |
| Vaccination against paratuberculosis – I & s-I – 10-year average   | 2 | (a) minimum temperature at 2 m                                                                                               |
| Vaccination against paratuberculosis – I & s-I – 2-year average    | 1 | --                                                                                                                           |
| Vaccination against paratuberculosis – s-E & E – 10-year average   | 2 | (a) maximum temperature at 2 m                                                                                               |
| Vaccination against paratuberculosis – s-E & E – 2-year average    | 1 | --                                                                                                                           |

|                                                                         |   |                                                                                                                                                                            |
|-------------------------------------------------------------------------|---|----------------------------------------------------------------------------------------------------------------------------------------------------------------------------|
| Vaccination against pneumonia – sheep – 10-year average                 | 4 | (a) Routine administration of antibiotics to newborns, (b) Period spent daily by farmer at the farm premises, (c) maximum temperature at 2 m, (d) relative humidity at 2 m |
| Vaccination against pneumonia – sheep – 2-year average                  | 4 | (a) Routine administration of antibiotics to newborns, (b) Period spent daily by farmer at the farm premises, (c) maximum temperature at 2 m, (d) relative humidity at 2 m |
| Vaccination against pneumonia – goats – 10-year average                 | 3 | (a) minimum temperature at 2 m, (b) temperature range at 2 m, (c) relative humidity at 2m                                                                                  |
| Vaccination against pneumonia – goats – 2-year average                  | 1 | (a) relative humidity at 2 m                                                                                                                                               |
| Vaccination against pneumonia – I & s-I – 10-year average               | 3 | (a) Period spent daily by farmer at the farm premises, (b) maximum temperature at 2 m, (c) relative humidity at 2 m                                                        |
| Vaccination against pneumonia – I & s-I – 2-year average                | 4 | (a) Period spent daily by farmer at the farm premises, (c) relative humidity at 2 m                                                                                        |
| Vaccination against pneumonia – s-E & E – 10-year average               | 3 | (a) Routine administration of antibiotics to newborns, (b) Period spent daily by farmer at the farm premises, (c) relative humidity at 2 m                                 |
| Vaccination against pneumonia – s-E & E – 2-year average                | 3 | (a) Routine administration of antibiotics to newborns, (b) Period spent daily by farmer at the farm premises, (c) relative humidity at 2 m                                 |
| Vaccination against staphylococcal mastitis – sheep – 10-year average   | 3 | (a) Collaboration with a veterinarian, (b) Use of laboratory diagnostic examinations in milk samples, (c) wind speed at 10 m                                               |
| Vaccination against staphylococcal mastitis – sheep – 2-year average    | 3 | (a) Collaboration with a veterinarian, (b) Use of laboratory diagnostic examinations in milk samples, (c) wind speed at 10 m                                               |
| Vaccination against staphylococcal mastitis – goats – 10-year average   | 3 | (a) Type of milking mode, (b) Daily number of milking sessions, (c) Daily period spent by farmer at the farm                                                               |
| Vaccination against staphylococcal mastitis – goats – 2-year average    | 4 | (a) Type of milking mode, (b) Daily number of milking sessions, (c) Daily period spent by farmer at the farm                                                               |
| Vaccination against staphylococcal mastitis – I & s-I – 10-year average | 5 | (a) Type of milking mode, (b) Use of laboratory diagnostic examinations in milk samples, (c) Daily number of milking sessions                                              |
| Vaccination against staphylococcal mastitis – I & s-I – 2-year average  | 5 | (a) Type of milking mode, (b) Use of laboratory diagnostic examinations in milk samples, (c) Daily number of milking sessions                                              |
| Vaccination against staphylococcal mastitis – s-E & E – 10-year average | 7 | (a) Type of milking mode, (b) Collaboration with a veterinarian, (c) Use of laboratory diagnostic examinations in milk samples, (d) Daily number of milking sessions       |

|                                                                            |    |                                                                                                                                                                                                                                                                                                                                                                                                            |
|----------------------------------------------------------------------------|----|------------------------------------------------------------------------------------------------------------------------------------------------------------------------------------------------------------------------------------------------------------------------------------------------------------------------------------------------------------------------------------------------------------|
| Vaccination against staphylococcal mastitis – s-E & E – 2-year average     | 9  | (a) Type of milking mode, (b) Collaboration with a veterinarian, (c) temperature of Earth skin, (d) temperature at 2 m, (e) precipitation, (f) wind speed at 10 m                                                                                                                                                                                                                                          |
| Total number of optional vaccines administered – sheep – 10-year average   | 10 | (a) Management system applied in farms, (b) Collaboration with a veterinarian, (c) Use of laboratory diagnostic examinations in milk samples, (d) Age of newborns when taken away from dam, (e) Daily number of milking sessions, (f) Routine administration of antibiotics to newborns, (g) Age of farmers,                                                                                               |
| Total number of optional vaccines administered – sheep – 2-year average    | 11 | (a) Management system applied in farms, (b) Collaboration with a veterinarian, (c) Use of laboratory diagnostic examinations in milk samples, (d) Age of newborns when taken away from dam, (e) Daily number of milking sessions, (f) Routine administration of antibiotics to newborns, (g) Age of farmers, (h) temperature of Earth skin, (i) maximum temperature at 2 m, (j) minimum temperature at 2 m |
| Total number of optional vaccines administered – goats – 10-year average   | 2  | (a) Period spent daily by farmer at the farm premises, (b) maximum temperature at 2 m                                                                                                                                                                                                                                                                                                                      |
| Total number of optional vaccines administered – goats – 2-year average    | 1  | (a) Period spent daily by farmer at the farm premises                                                                                                                                                                                                                                                                                                                                                      |
| Total number of optional vaccines administered – I & s-I – 10-year average | 7  | (a) Use of laboratory diagnostic examinations in milk samples, (b) Age of newborns when taken away from dam, (c) Daily number of milking sessions                                                                                                                                                                                                                                                          |
| Total number of optional vaccines administered – I & s-I – 2-year average  | 7  | (a) Use of laboratory diagnostic examinations in milk samples, (b) Age of newborns when taken away from dam, (c) Daily number of milking sessions                                                                                                                                                                                                                                                          |
| Total number of optional vaccines administered – s-E & E – 10-year average | 11 | (a) Collaboration with a veterinarian, (b) Use of laboratory diagnostic examinations in milk samples, (c) Age of newborns when taken away from dam, (d) Routine administration of antibiotics to newborns, (e) Age of farmers, (f) Period spent daily by farmer at the farm premises, (g) temperature at 2 m, (h) maximum temperature at 2 m, (i) temperature range at 2 m, (j) precipitation              |
| Total number of optional vaccines administered – s-E & E – 2-year average  | 11 | (a) Collaboration with a veterinarian, (b) Use of laboratory diagnostic examinations in milk samples, (c) Age of newborns when taken away from dam, (d) Daily number of milking sessions, (e) Routine administration of antibiotics to newborns, (e) Age of farmers, (f) Period spent daily by farmer at the farm premises, (g) temperature at 2 m, (h) minimum temperature at 2 m, (i) wind speed at 10 m |

1 I: intensive, E: extensive, s: semi.

**Figure S1.** Visual presentation of differences in the climatic variables assessed for associations with vaccination against infections in 444 small ruminant farms in Greece, with comparisons made between the 10-year (2010-2019) and the 2-year (2018-2019) datasets (average values for the entire time-period covered by each dataset): differences in shade between the two bars in the below histograms indicate significant differences between the respective values.

(a) Temperature of Earth skin (°C)

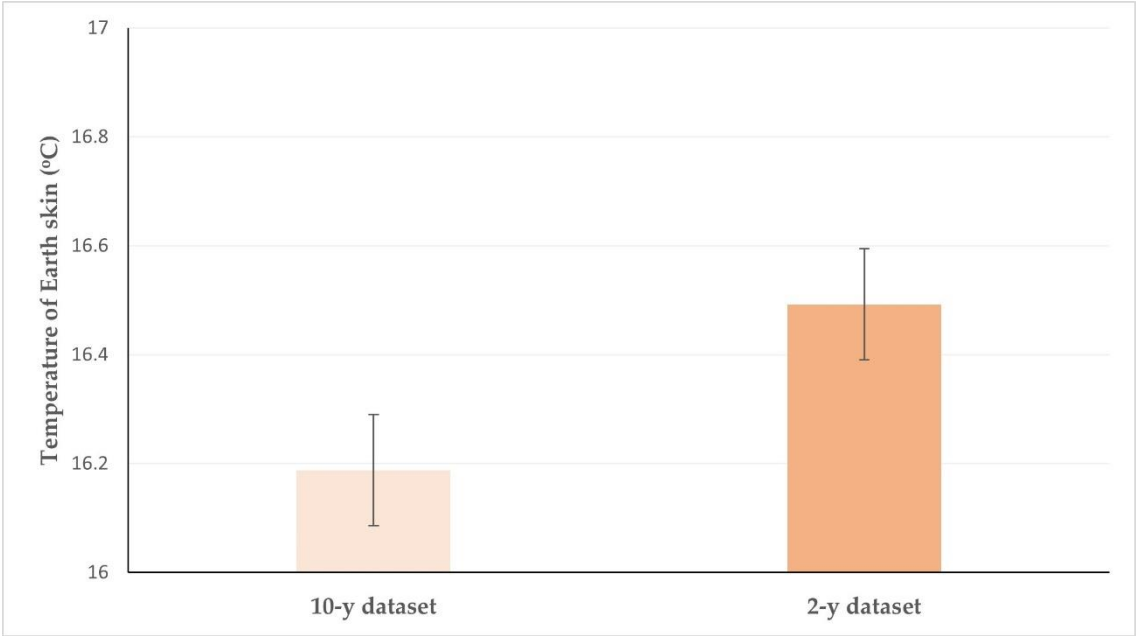

(b) Temperature at 2 m (°C)

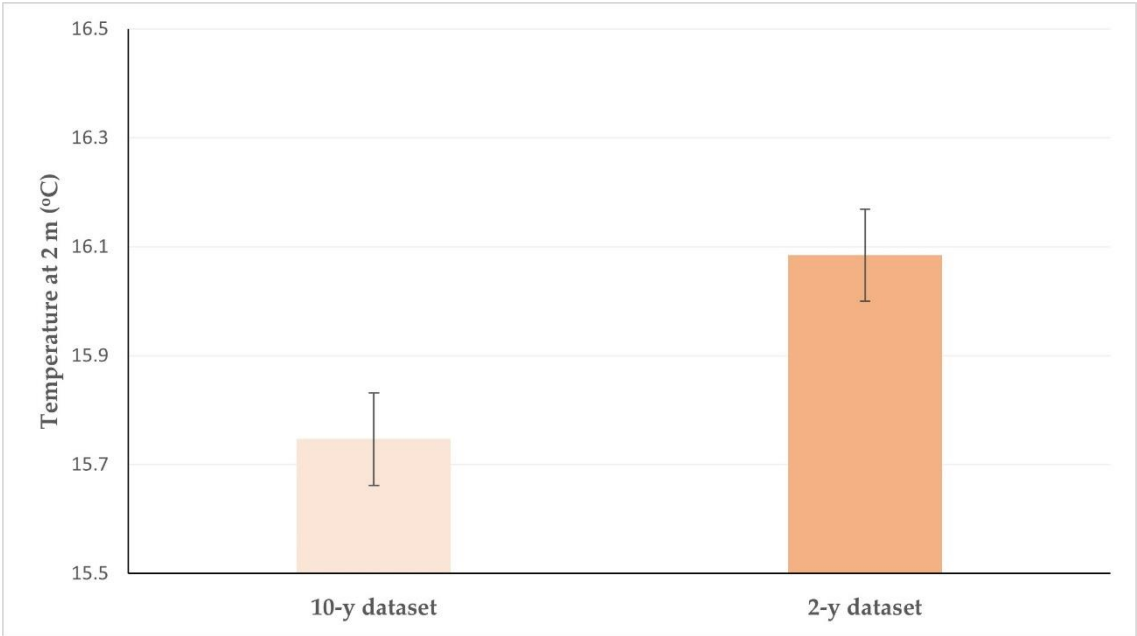

(c) Maximum temperature at 2 m (°C)

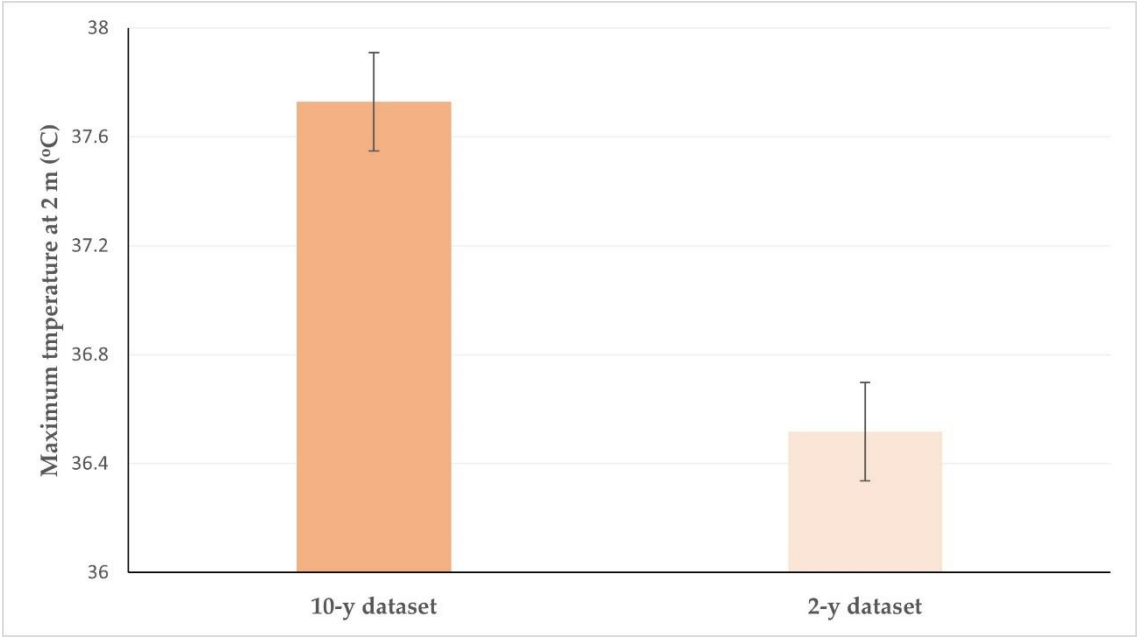

(d) Minimum temperature at 2 m (°C)

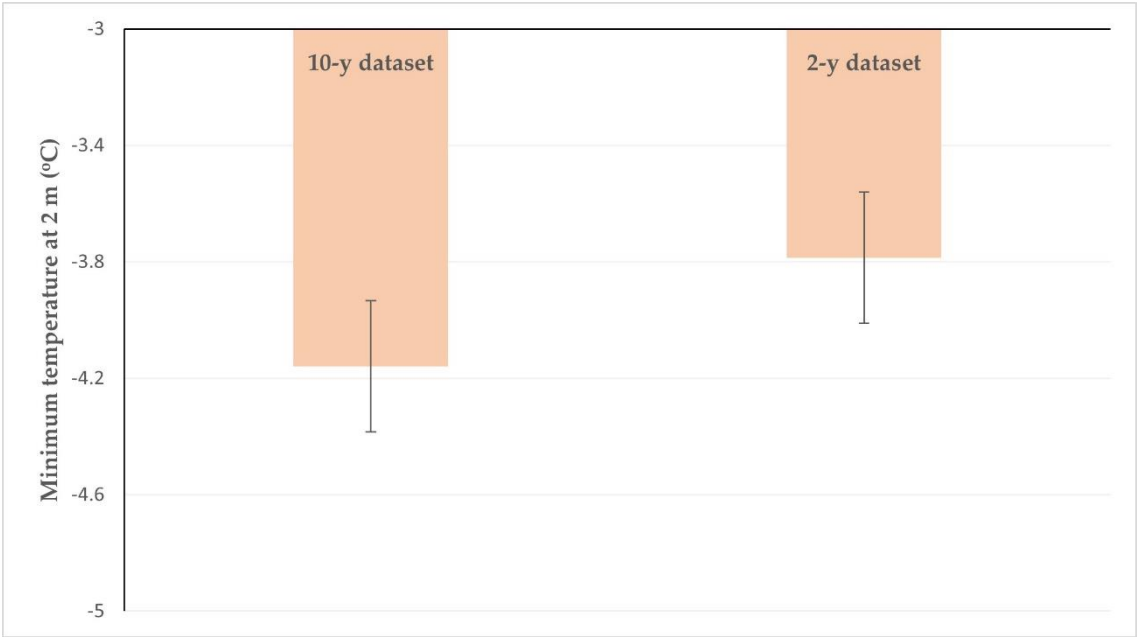

(e) Temperature range at 2 m (°C)

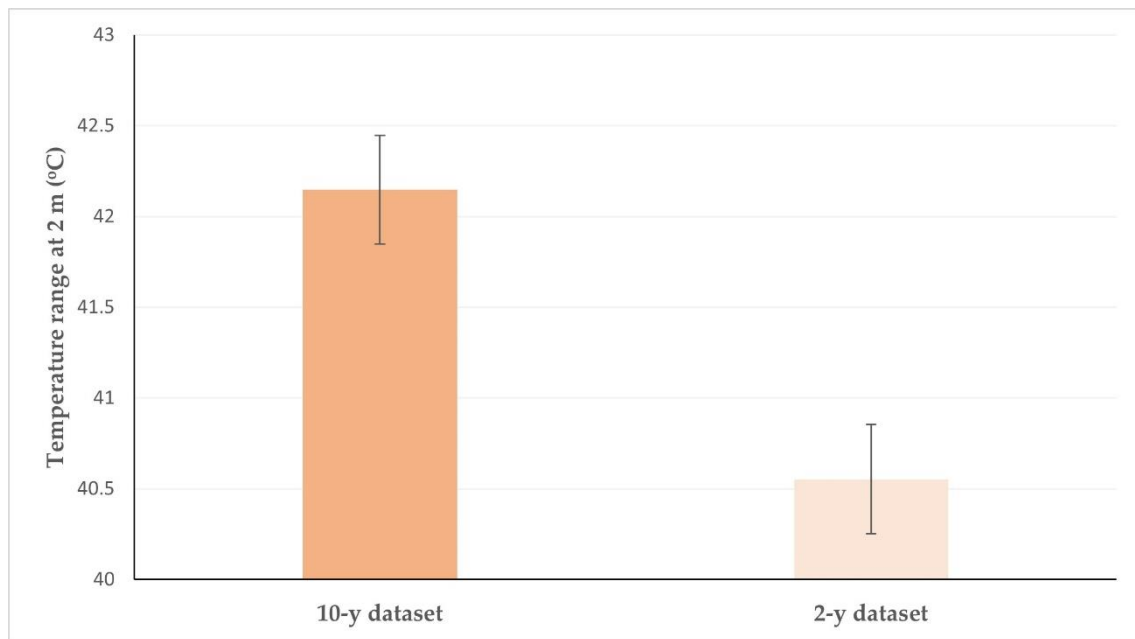

(f) Relative humidity at 2 m (%)

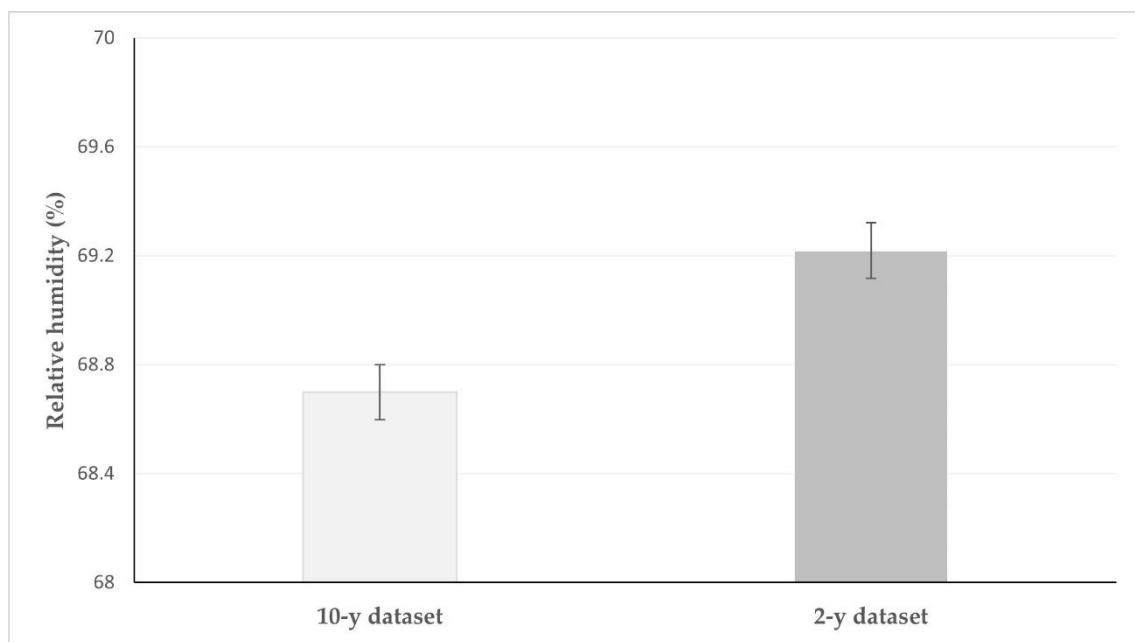

(g) Precipitation (mm)

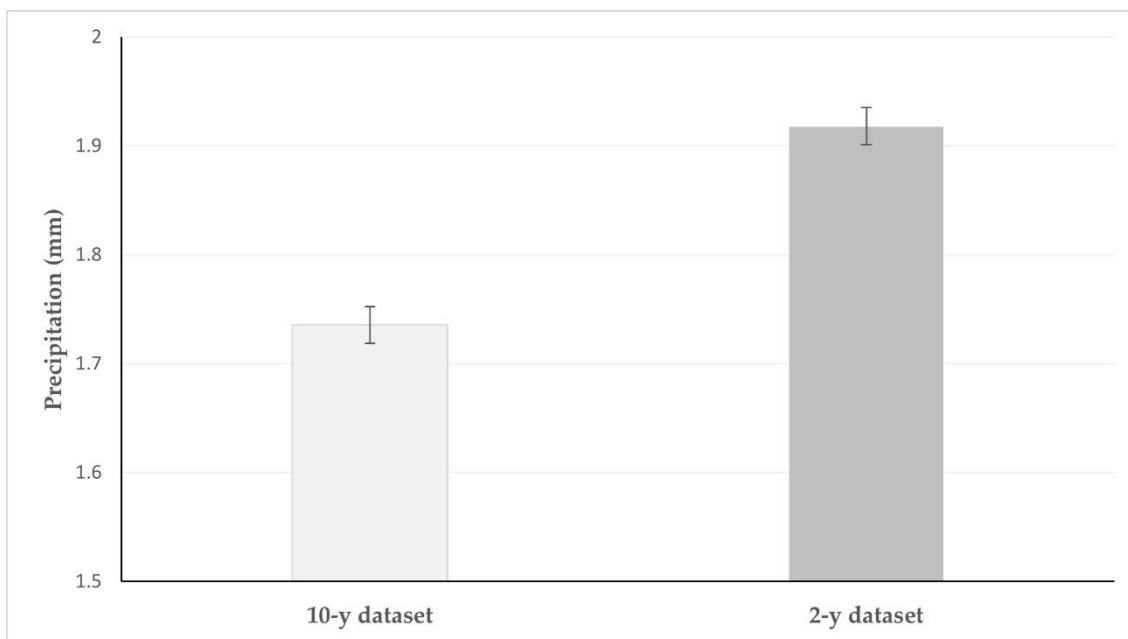

(h) Wind speed at 10 m ( $\text{mm s}^{-1}$ )

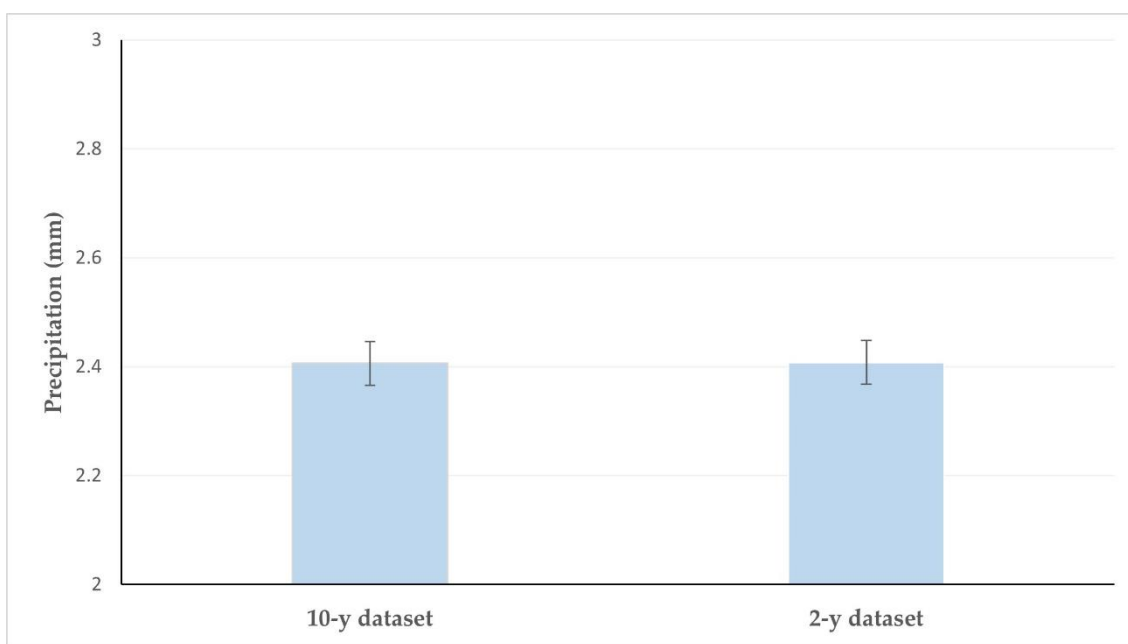

**Table S3.** Results of univariable analysis of climate conditions (mean  $\pm$  standard error of the mean) for associations with optional vaccination against chlamydial abortion in 444 small ruminant farms in Greece.

Sheep flocks

| Vaccination performed                   |                | Vaccination not performed |                | <i>p</i> <sup>1</sup> |
|-----------------------------------------|----------------|---------------------------|----------------|-----------------------|
| 10-year average                         | 2-year average | 10-year average           | 2-year average |                       |
| Temperature of Earth skin (°C)          |                |                           |                |                       |
| 15.8 ± 0.2                              | 16.2 ± 0.2     | 16.5 ± 0.2                | 16.8 ± 0.2     | 0.007 / 0.007         |
| Temperature at 2 m (°C)                 |                |                           |                |                       |
| 15.5 ± 0.1                              | 15.8 ± 0.1     | 16.0 ± 0.1                | 16.3 ± 0.2     | 0.019 / 0.017         |
| Maximum temperature at 2 m (°C)         |                |                           |                |                       |
| 37.9 ± 0.5                              | 39.6 ± 0.5     | 37.7 ± 0.2                | 36.5 ± 0.2     | 0.72 / 0.81           |
| Minimum temperature at 2 m (°C)         |                |                           |                |                       |
| −4.7 ± 0.4                              | −0.5 ± 0.4     | −3.6 ± 0.3                | −0.2 ± 0.4     | 0.024 / 0.015         |
| Temperature range at 2 m (°C)           |                |                           |                |                       |
| 43.5 ± 0.2                              | 41.9 ± 0.4     | 41.3 ± 0.5                | 39.7 ± 0.5     | 0.0005 / 0.0006       |
| Relative humidity at 2 m (%)            |                |                           |                |                       |
| 68.4 ± 0.2                              | 68.9 ± 0.2     | 68.8 ± 0.2                | 69.3 ± 0.2     | 0.10 / 0.08           |
| Precipitation (mm)                      |                |                           |                |                       |
| 1.8 ± 0.0                               | 2.0 ± 0.0      | 1.7 ± 0.0                 | 1.9 ± 0.0      | 0.08 / 0.13           |
| Wind speed at 10 m (m s <sup>−1</sup> ) |                |                           |                |                       |
| 2.2± 0.1                                | 2.2± 0.1       | 2.5± 0.1                  | 2.5± 0.1       | <0.0001 / < 0.0001    |

Goat herds

| Vaccination performed           |                | Vaccination not performed |                | <i>p</i>     |
|---------------------------------|----------------|---------------------------|----------------|--------------|
| 10-year average                 | 2-year average | 10-year average           | 2-year average |              |
| Temperature of Earth skin (°C)  |                |                           |                |              |
| 15.6 ± 0.3                      | 15.9 ± 0.3     | 16.3 ± 0.3                | 16.7 ± 0.3     | 0.06 / 0.06  |
| Temperature at 2 m (°C)         |                |                           |                |              |
| 15.3 ± 0.3                      | 15.6 ± 0.3     | 15.9 ± 0.2                | 16.2 ± 0.2     | 0.10 / 0.09  |
| Maximum temperature at 2 m (°C) |                |                           |                |              |
| 38.3 ± 0.3                      | 36.9 ± 0.3     | 37.4 ± 0.3                | 36.3 ± 0.3     | 0.045 / 0.09 |
|                                 |                |                           |                |              |

|            |            | <b>Minimum temperature at 2 m (°C)</b>       |            |               |
|------------|------------|----------------------------------------------|------------|---------------|
| -0.4 ± 0.7 | -0.2 ± 0.7 | -0.8 ± 0.6                                   | -0.4 ± 0.6 | 0.08 / 0.08   |
|            |            | <b>Temperature range at 2 m (°C)</b>         |            |               |
| 43.7 ± 0.9 | 42.1 ± 0.9 | 41.2 ± 0.8                                   | 39.7 ± 0.8 | 0.035 / 0.043 |
|            |            | <b>Relative humidity at 2 m (%)</b>          |            |               |
| 68.9 ± 0.3 | 69.3 ± 0.3 | 68.9 ± 0.2                                   | 69.4 ± 0.2 | 0.85 / 0.86   |
|            |            | <b>Precipitation (mm)</b>                    |            |               |
| 1.8 ± 0.1  | 2.0 ± 0.1  | 1.7 ± 0.0                                    | 1.9 ± 0.0  | 0.019 / 0.09  |
|            |            | <b>Wind speed at 10 m (m s<sup>-1</sup>)</b> |            |               |
| 2.2 ± 0.1  | 2.2 ± 0.1  | 2.6 ± 0.1                                    | 2.6 ± 0.1  | 0.011 / 0.010 |

Farms with intensive or semi-intensive management

| <b>Vaccination performed</b> |                | <b>Vaccination not performed</b>             |                | <b><i>p</i></b> |
|------------------------------|----------------|----------------------------------------------|----------------|-----------------|
| 10-year average              | 2-year average | 10-year average                              | 2-year average |                 |
|                              |                | <b>Temperature of Earth skin (°C)</b>        |                |                 |
| 15.5 ± 0.2                   | 16.0 ± 0.2     | 15.7 ± 0.2                                   | 15.8 ± 0.2     | 0.38 / 0.42     |
|                              |                | <b>Temperature at 2 m (°C)</b>               |                |                 |
| 15.2 ± 0.1                   | 15.8 ± 0.1     | 15.4 ± 0.1                                   | 15.6 ± 0.1     | 0.34 / 0.34     |
|                              |                | <b>Maximum temperature at 2 m (°C)</b>       |                |                 |
| 37.9 ± 0.6                   | 37.2 ± 0.2     | 38.5 ± 0.3                                   | 36.7 ± 0.6     | 0.34 / 0.40     |
|                              |                | <b>Minimum temperature at 2 m (°C)</b>       |                |                 |
| -5.5 ± 0.4                   | -5.3 ± 0.4     | -5.4 ± 0.8                                   | -5.3 ± 0.4     | 0.84 / 0.99     |
|                              |                | <b>Temperature range at 2 m (°C)</b>         |                |                 |
| 44.6 ± 0.4                   | 42.5 ± 0.5     | 44.0 ± 0.3                                   | 43.0 ± 0.4     | 0.31 / 0.41     |
|                              |                | <b>Relative humidity at 2 m (%)</b>          |                |                 |
| 68.2 ± 0.2                   | 68.5 ± 0.2     | 68.1 ± 0.6                                   | 68.6 ± 0.2     | 0.55 / 0.82     |
|                              |                | <b>Precipitation (mm)</b>                    |                |                 |
| 1.7 ± 0.0                    | 1.9 ± 0.0      | 1.7 ± 0.8                                    | 1.9 ± 0.0      | 0.77 / 0.60     |
|                              |                | <b>Wind speed at 10 m (m s<sup>-1</sup>)</b> |                |                 |
| 2.1 ± 0.1                    | 2.1 ± 0.1      | 2.1 ± 0.4                                    | 2.0 ± 0.1      | 0.37 / 0.37     |

Farms with semi-extensive or extensive management

| Vaccination performed                   |                | Vaccination not performed |                | <i>p</i>          |
|-----------------------------------------|----------------|---------------------------|----------------|-------------------|
| 10-year average                         | 2-year average | 10-year average           | 2-year average |                   |
| Temperature of Earth skin (°C)          |                |                           |                |                   |
| 16.3 ± 0.3                              | 16.5 ± 0.2     | 17.0 ± 0.2                | 17.3 ± 0.2     | 0.023 / 0.018     |
| Temperature at 2 m (°C)                 |                |                           |                |                   |
| 15.8 ± 0.2                              | 16.1 ± 0.2     | 16.3 ± 0.2                | 16.6 ± 0.2     | 0.07 / 0.06       |
| Maximum temperature at 2 m (°C)         |                |                           |                |                   |
| 38.0 ± 0.3                              | 36.7 ± 0.3     | 36.9 ± 0.2                | 35.8 ± 0.2     | 0.001 / 0.010     |
| Minimum temperature at 2 m (°C)         |                |                           |                |                   |
| -3.9 ± 0.5                              | -3.6 ± 0.6     | -2.4 ± 0.4                | -1.7 ± 0.4     | 0.025 / 0.011     |
| Temperature range at 2 m (°C)           |                |                           |                |                   |
| 41.9 ± 0.7                              | 40.2 ± 0.7     | 39.2 ± 0.6                | 37.5 ± 0.6     | 0.004 / 0.004     |
| Relative humidity at 2 m (%)            |                |                           |                |                   |
| 68.9 ± 0.2                              | 69.6 ± 0.2     | 69.4 ± 0.2                | 70.0 ± 0.2     | 0.19 / 0.24       |
| Precipitation (mm)                      |                |                           |                |                   |
| 1.9 ± 0.0                               | 2.1 ± 0.1      | 1.7 ± 0.0                 | 1.9 ± 0.0      | 0.0001 / < 0.0001 |
| Wind speed at 10 m (m s <sup>-1</sup> ) |                |                           |                |                   |
| 2.4 ± 0.1                               | 2.4 ± 0.1      | 2.9 ± 0.1                 | 2.9 ± 0.1      | 0.0002 / 0.0001   |

1. xxx / zzz: *p*-value for comparison between farms in which vaccination was or was not performed for 10-year average / 2-year average

**Table S4.** Results of univariable analysis of climate conditions (mean  $\pm$  standard error of the mean) for associations with optional vaccination against clostridial infections in 444 small ruminant farms in Greece.

Sheep flocks

| Vaccination performed |                | Vaccination not performed               |                | <i>p</i> <sup>1</sup> |
|-----------------------|----------------|-----------------------------------------|----------------|-----------------------|
| 10-year average       | 2-year average | 10-year average                         | 2-year average |                       |
|                       |                | Temperature of Earth skin (°C)          |                |                       |
| 16.2 $\pm$ 0.1        | 16.2 $\pm$ 0.1 | 18.2 $\pm$ 0.9                          | 18.2 $\pm$ 0.9 | 0.05 / 0.05           |
|                       |                | Temperature at 2 m (°C)                 |                |                       |
| 15.7 $\pm$ 0.1        | 15.7 $\pm$ 0.1 | 16.9 $\pm$ 0.6                          | 17.0 $\pm$ 0.1 | 0.07 / 0.07           |
|                       |                | Maximum temperature at 2 m (°C)         |                |                       |
| 37.8 $\pm$ 0.2        | 37.7 $\pm$ 0.2 | 36.2 $\pm$ 0.9                          | 36.5 $\pm$ 0.9 | 0.14 / 0.14           |
|                       |                | Minimum temperature at 2 m (°C)         |                |                       |
| -0.2 $\pm$ 0.3        | -0.2 $\pm$ 0.3 | -0.1 $\pm$ 1.8                          | -0.1 $\pm$ 1.8 | 0.048 / 0.049         |
|                       |                | Temperature range at 2 m (°C)           |                |                       |
| 42.4 $\pm$ 0.3        | 42.4 $\pm$ 0.3 | 36.2 $\pm$ 2.6                          | 36.2 $\pm$ 2.6 | 0.049 / 0.049         |
|                       |                | Relative humidity at 2 m (%)            |                |                       |
| 68.6 $\pm$ 0.1        | 68.6 $\pm$ 0.1 | 69.7 $\pm$ 0.7                          | 69.7 $\pm$ 0.7 | 0.15 / 0.15           |
|                       |                | Precipitation (mm)                      |                |                       |
| 1.7 $\pm$ 0.0         | 1.7 $\pm$ 0.0  | 1.5 $\pm$ 0.1                           | 1.5 $\pm$ 0.1  | 0.044 / 0.045         |
|                       |                | Wind speed at 10 m (m s <sup>-1</sup> ) |                |                       |
| 2.4 $\pm$ 0.1         | 2.4 $\pm$ 0.1  | 3.3 $\pm$ 0.4                           | 3.3 $\pm$ 0.4  | 0.044 / 0.045         |

Goat herds

| Vaccination performed |                | Vaccination not performed       |                | <i>p</i>    |
|-----------------------|----------------|---------------------------------|----------------|-------------|
| 10-year average       | 2-year average | 10-year average                 | 2-year average |             |
|                       |                | Temperature of Earth skin (°C)  |                |             |
| 16.2 $\pm$ 0.1        | 16.4 $\pm$ 0.2 | 15.0                            | 15.3           | 0.52 / 0.47 |
|                       |                | Temperature at 2 m (°C)         |                |             |
| 15.7 $\pm$ 0.1        | 16.0 $\pm$ 0.2 | 14.5                            | 14.7           | 0.41 / 0.35 |
|                       |                | Maximum temperature at 2 m (°C) |                |             |
| 37.8 $\pm$ 0.2        | 36.5 $\pm$ 0.2 | 37.5                            | 35.7           | 0.94 / 0.64 |
|                       |                | Minimum temperature at 2 m (°C) |                |             |
| -0.2 $\pm$ 0.3        | -0.0 $\pm$ 0.5 | -0.6                            | -0.9           | 0.94 / 0.97 |

|            |            |                                         |      |      |               |
|------------|------------|-----------------------------------------|------|------|---------------|
| 42.4 ± 0.3 | 40.5 ± 0.6 | Temperature range at 2 m (°C)           | 42.2 | 39.6 | 0.97 / 0.85   |
| 68.6 ± 0.1 | 69.4 ± 0.2 | Relative humidity at 2 m (%)            | 71.4 | 72.3 | 0.049 / 0.035 |
| 1.7 ± 0.0  | 1.9 ± 0.0  | Precipitation (mm)                      | 2.0  | 2.3  | 0.21 / 0.15   |
| 2.4 ± 0.1  | 2.4 ± 0.1  | Wind speed at 10 m (m s <sup>-1</sup> ) | 2.3  | 2.4  | 0.87 / 0.09   |

Farms with intensive or semi-intensive management

| Vaccination performed                   |                | Vaccination not performed |                | <i>p</i>    |
|-----------------------------------------|----------------|---------------------------|----------------|-------------|
| 10-year average                         | 2-year average | 10-year average           | 2-year average |             |
| Temperature of Earth skin (°C)          |                |                           |                |             |
| 15.5 ± 0.2                              | 15.9 ± 0.1     | 15.7 ± 0.2                | 15.7 ± 0.6     | 0.38 / 0.79 |
| Temperature at 2 m (°C)                 |                |                           |                |             |
| 15.2 ± 0.1                              | 15.7 ± 0.1     | 15.4 ± 0.1                | 15.6 ± 0.4     | 0.34 / 0.86 |
| Maximum temperature at 2 m (°C)         |                |                           |                |             |
| 37.9 ± 0.6                              | 36.9 ± 0.3     | 38.5 ± 0.2                | 37.9 ± 0.9     | 0.34 / 0.48 |
| Minimum temperature at 2 m (°C)         |                |                           |                |             |
| −0.5 ± 0.4                              | −0.3 ± 0.3     | −0.4 ± 0.3                | −0.3 ± 2.0     | 0.84 / 0.99 |
| Temperature range at 2 m (°C)           |                |                           |                |             |
| 44.6 ± 0.4                              | 42.8 ± 0.3     | 44.0 ± 0.4                | 43.2 ± 0.9     | 0.31 / 0.0  |
| Relative humidity at 2 m (%)            |                |                           |                |             |
| 68.2 ± 0.2                              | 68.6 ± 0.1     | 68.1 ± 0.2                | 68.5 ± 0.5     | 0.55/ 0.90  |
| Precipitation (mm)                      |                |                           |                |             |
| 1.7 ± 0.0                               | 1.9 ± 0.0      | 1.7 ± 0.1                 | 2.0 ± 0.1      | 0.77 / 0.58 |
| Wind speed at 10 m (m s <sup>−1</sup> ) |                |                           |                |             |
| 2.1± 0.1                                | 2.1 ± 0.1      | 2.1 ± 0.2                 | 1.9 ± 0.2      | 0.37 / 0.59 |

Farms with semi-extensive or extensive management

| Vaccination performed                   |                | Vaccination not performed |                | <i>p</i>      |
|-----------------------------------------|----------------|---------------------------|----------------|---------------|
| 10-year average                         | 2-year average | 10-year average           | 2-year average |               |
| Temperature of Earth skin (°C)          |                |                           |                |               |
| 16.3 ± 0.3                              | 16.2 ± 0.1     | 17.0 ± 0.2                | 18.2 ± 0.9     | 0.05 / 0.05   |
| Temperature at 2 m (°C)                 |                |                           |                |               |
| 15.8 ± 0.2                              | 15.7 ± 0.1     | 16.3 ± 0.2                | 17.0 ± 0.6     | 0.07 / 0.07   |
| Maximum temperature at 2 m (°C)         |                |                           |                |               |
| 38.0 ± 0.3                              | 37.8 ± 0.2     | 36.9 ± 0.2                | 36.2 ± 0.9     | 0.14 / 0.13   |
| Minimum temperature at 2 m (°C)         |                |                           |                |               |
| -0.9 ± 0.5                              | -0.2 ± 0.3     | -0.4 ± 0.4                | -0.1 ± 1.8     | 0.048 / 0.048 |
| Temperature range at 2 m (°C)           |                |                           |                |               |
| 41.9 ± 0.7                              | 42.4 ± 0.3     | 39.2 ± 0.6                | 36.2 ± 2.6     | 0.049 / 0.049 |
| Relative humidity at 2 m (%)            |                |                           |                |               |
| 68.9 ± 0.2                              | 68.6 ± 0.1     | 69.4 ± 0.2                | 70.0 ± 0.7     | 0.15 / 0.15   |
| Precipitation (mm)                      |                |                           |                |               |
| 1.9 ± 0.1                               | 1.7 ± 0.0      | 1.7 ± 0.0                 | 1.5 ± 0.1      | 0.045 / 0.045 |
| Wind speed at 10 m (m s <sup>-1</sup> ) |                |                           |                |               |
| 2.4 ± 0.1                               | 2.4 ± 0.1      | 2.9 ± 0.1                 | 3.2 ± 0.4      | 0.045 / 0.044 |

1. xxx / zzz: p-value for comparison between farms in which vaccination was or was not performed for 10-year average / 2-year average

**Table S5.** Results of univariable analysis of climate conditions (mean  $\pm$  standard error of the mean) for associations with optional vaccination against contagious agalactia in 444 small ruminant farms in Greece.

Sheep flocks

| Vaccination performed                   |                | Vaccination not performed |                | <i>p</i> <sup>1</sup> |
|-----------------------------------------|----------------|---------------------------|----------------|-----------------------|
| 10-year average                         | 2-year average | 10-year average           | 2-year average |                       |
| Temperature of Earth skin (°C)          |                |                           |                |                       |
| 15.7 ± 0.1                              | 16.0 ± 0.1     | 17.0 ± 0.2                | 17.3 ± 0.2     | < 0.0001 / < 0.0001   |
| Temperature at 2 m (°C)                 |                |                           |                |                       |
| 15.3 ± 0.1                              | 15.7 ± 0.1     | 16.4 ± 0.2                | 16.7 ± 0.2     | < 0.0001 / < 0.0001   |
| Maximum temperature at 2 m (°C)         |                |                           |                |                       |
| 38.3 ± 0.3                              | 37.0 ± 0.3     | 37.1 ± 0.4                | 36.0 ± 0.4     | 0.013 / 0.036         |
| Minimum temperature at 2 m (°C)         |                |                           |                |                       |
| −0.2 ± 0.3                              | −0.9 ± 0.3     | −0.5 ± 0.4                | −0.1 ± 0.5     | < 0.0001 / 0.049      |
| Temperature range at 2 m (°C)           |                |                           |                |                       |
| 43.8 ± 0.3                              | 42.2 ± 0.3     | 40.0 ± 0.6                | 38.4 ± 0.6     | < 0.0001 / < 0.0001   |
| Relative humidity at 2 m (%)            |                |                           |                |                       |
| 68.4 ± 0.0                              | 68.9 ± 0.2     | 68.9 ± 0.2                | 69.4 ± 0.2     | 0.035 / < 0.0001      |
| Precipitation (mm)                      |                |                           |                |                       |
| 1.8 ± 0.0                               | 1.9 ± 0.0      | 1.7 ± 0.0                 | 1.9 ± 0.1      | 0.15 / 0.06           |
| Wind speed at 10 m (m s <sup>−1</sup> ) |                |                           |                |                       |
| 2.2± 0.1                                | 2.2 ± 0.1      | 2.7 ± 0.1                 | 2.7 ± 0.1      | < 0.0001 / < 0.0001   |

Goat herds

| Vaccination performed           |                | Vaccination not performed |                | <i>p</i>        |
|---------------------------------|----------------|---------------------------|----------------|-----------------|
| 10-year average                 | 2-year average | 10-year average           | 2-year average |                 |
| Temperature of Earth skin (°C)  |                |                           |                |                 |
| 15.6 ± 0.2                      | 15.9 ± 0.2     | 16.7 ± 0.4                | 17.0 ± 0.4     | 0.016 / 0.013   |
| Temperature at 2 m (°C)         |                |                           |                |                 |
| 15.2 ± 0.2                      | 15.6 ± 0.2     | 16.1 ± 0.3                | 16.5 ± 0.3     | 0.023 / 0.018   |
| Maximum temperature at 2 m (°C) |                |                           |                |                 |
| 38.4 ± 0.2                      | 37.1 ± 0.2     | 36.7 ± 0.4                | 35.7 ± 0.4     | 0.0006 / 0.0007 |
| Minimum temperature at 2 m (°C) |                |                           |                |                 |
| −0.5 ± 0.5                      | −0.3 ± 0.5     | −0.9 ± 0.8                | −0.4 ± 0.8     | 0.007/ 0.005    |

|            |            |                                             |            |                 |
|------------|------------|---------------------------------------------|------------|-----------------|
| 43.9 ± 0.6 | 42.4 ± 0.5 | Temperature range at 2 m (°C)<br>39.7 ± 1.1 | 38.1 ± 1.1 | 0.0009 / 0.0007 |
| 68.5 ± 0.2 | 68.9 ± 0.2 | Relative humidity at 2 m (%)<br>69.4 ± 0.2  | 69.9 ± 0.2 | 0.008 / 0.006   |
| 1.7 ± 0.0  | 1.9 ± 0.0  | Precipitation (mm)<br>1.7 ± 0.1             | 1.9 ± 0.1  | 0.85 / 0.87     |
|            |            | Wind speed at 10 m (m s <sup>-1</sup> )     |            |                 |
| 2.2 ± 0.1  | 2.2 ± 0.1  | 2.7 ± 0.1                                   | 2.8 ± 0.1  | 0.001 / 0.001   |

Farms with intensive or semi-intensive management

| Vaccination performed |                | Vaccination not performed               |                | <i>p</i>       |
|-----------------------|----------------|-----------------------------------------|----------------|----------------|
| 10-year average       | 2-year average | 10-year average                         | 2-year average |                |
|                       |                | Temperature of Earth skin (°C)          |                |                |
| 15.4 ± 0.2            | 15.7 ± 0.1     | 16.0 ± 0.3                              | 16.3 ± 0.3     | 0.027 / 0.026  |
|                       |                | Temperature at 2 m (°C)                 |                |                |
| 15.2 ± 0.1            | 15.5 ± 0.1     | 15.6 ± 0.2                              | 16.0 ± 0.2     | 0.05 / 0.05    |
|                       |                | Maximum temperature at 2 m (°C)         |                |                |
| 38.6 ± 0.3            | 37.3 ± 0.3     | 37.6 ± 0.7                              | 36.3 ± 0.6     | 0.21 / 0.20    |
|                       |                | Minimum temperature at 2 m (°C)         |                |                |
| -0.0 ± 0.3            | -0.9 ± 0.3     | -0.5 ± 0.6                              | -0.1 ± 0.6     | 0.014 / 0.011  |
|                       |                | Temperature range at 2 m (°C)           |                |                |
| 44.9 ± 0.3            | 43.5 ± 0.3     | 42.9 ± 0.6                              | 41.2 ± 0.7     | 0.004 / 0.004  |
|                       |                | Relative humidity at 2 m (%)            |                |                |
| 68.0 ± 0.1            | 68.4 ± 0.2     | 68.4 ± 0.3                              | 69.0 ± 0.3     | 0.15 / 0.09    |
|                       |                | Precipitation (mm)                      |                |                |
| 1.7 ± 0.0             | 1.9 ± 0.0      | 1.7 ± 0.0                               | 1.9 ± 0.1      | 0.55 / 0.80    |
|                       |                | Wind speed at 10 m (m s <sup>-1</sup> ) |                |                |
| 2.0 ± 0.0             | 2.0 ± 0.1      | 2.3 ± 0.1                               | 2.3 ± 0.1      | 0.001 / 0.0009 |

Farms with semi-extensive or extensive management

| Vaccination performed                        |                | Vaccination not performed |                | <i>p</i>            |
|----------------------------------------------|----------------|---------------------------|----------------|---------------------|
| 10-year average                              | 2-year average | 10-year average           | 2-year average |                     |
| <b>Temperature of Earth skin (°C)</b>        |                |                           |                |                     |
| 16.0 ± 0.2                                   | 16.3 ± 0.2     | 17.4 ± 0.2                | 17.7 ± 0.2     | < 0.0001 / < 0.0001 |
| <b>Temperature at 2 m (°C)</b>               |                |                           |                |                     |
| 15.6 ± 0.2                                   | 15.9 ± 0.2     | 16.7 ± 0.2                | 17.0 ± 0.2     | < 0.0001 / < 0.0001 |
| <b>Maximum temperature at 2 m (°C)</b>       |                |                           |                |                     |
| 37.9 ± 0.2                                   | 36.6 ± 0.2     | 36.6 ± 0.3                | 35.6 ± 0.3     | 0.0001 / 0.002      |
| <b>Minimum temperature at 2 m (°C)</b>       |                |                           |                |                     |
| -0.3 ± 0.4                                   | -0.8 ± 0.4     | -1.6 ± 0.5                | -1.0 ± 0.5     | < 0.0001 / < 0.0001 |
| <b>Temperature range at 2 m (°C)</b>         |                |                           |                |                     |
| 42.2 ± 0.5                                   | 40.4 ± 0.4     | 38.2 ± 0.7                | 36.6 ± 0.7     | < 0.0001 / < 0.0001 |
| <b>Relative humidity at 2 m (%)</b>          |                |                           |                |                     |
| 69.1 ± 0.2                                   | 69.8 ± 0.2     | 69.4 ± 0.2                | 70.0 ± 0.2     | 0.18 / 0.48         |
| <b>Precipitation (mm)</b>                    |                |                           |                |                     |
| 1.8 ± 0.0                                    | 2.0 ± 0.0      | 1.7 ± 0.0                 | 1.9 ± 0.1      | 0.18 / 0.06         |
| <b>Wind speed at 10 m (m s<sup>-1</sup>)</b> |                |                           |                |                     |
| 2.4 ± 0.1                                    | 2.4 ± 0.1      | 3.0 ± 0.1                 | 3.0 ± 0.1      | < 0.0001 / < 0.0001 |

1. xxx / zzz: p-value for comparison between farms in which vaccination was or was not performed for 10-year average / 2-year average

**Table S6.** Results of univariable analysis of climate conditions (mean  $\pm$  standard error of the mean) for associations with optional vaccination against contagious ecthyma in 444 small ruminant farms in Greece.

Sheep flocks

| Vaccination performed |                 | Vaccination not performed               |                | $p^1$        |
|-----------------------|-----------------|-----------------------------------------|----------------|--------------|
| 10-year average       | 2-year average  | 10-year average                         | 2-year average |              |
|                       |                 | Temperature of Earth skin (°C)          |                |              |
| 12.9 $\pm$ 1.6        | 13.5 $\pm$ 1.5  | 16.2 $\pm$ 0.2                          | 16.5 $\pm$ 0.1 | 0.17 / 0.18  |
|                       |                 | Temperature at 2 m (°C)                 |                |              |
| 12.8 $\pm$ 1.3        | 13.3 $\pm$ 1.4  | 15.8 $\pm$ 0.2                          | 16.1 $\pm$ 0.1 | 0.16 / 0.18  |
|                       |                 | Maximum temperature at 2 m (°C)         |                |              |
| 35.9 $\pm$ 0.8        | 34.7 $\pm$ 0.9  | 37.8 $\pm$ 0.1                          | 36.5 $\pm$ 0.2 | 0.14 / 0.17  |
|                       |                 | Minimum temperature at 2 m (°C)         |                |              |
| -10.8 $\pm$ 2.5       | -10.4 $\pm$ 3.1 | -0.0 $\pm$ 0.1                          | -0.6 $\pm$ 0.3 | 0.11 / 0.16  |
|                       |                 | Temperature range at 2 m (°C)           |                |              |
| 46.7 $\pm$ 2.3        | 45.1 $\pm$ 2.6  | 42.2 $\pm$ 0.3                          | 40.6 $\pm$ 0.3 | 0.18 / 0.23  |
|                       |                 | Relative humidity at 2 m (%)            |                |              |
| 69.6 $\pm$ 0.2        | 69.3 $\pm$ 0.3  | 68.6 $\pm$ 0.1                          | 69.2 $\pm$ 0.2 | 0.015 / 0.73 |
|                       |                 | Precipitation (mm)                      |                |              |
| 1.6 $\pm$ 0.2         | 1.6 $\pm$ 0.1   | 1.7 $\pm$ 0.2                           | 1.9 $\pm$ 0.0  | 0.22 / 0.13  |
|                       |                 | Wind speed at 10 m (m s <sup>-1</sup> ) |                |              |
| 2.0 $\pm$ 0.4         | 2.0 $\pm$ 0.4   | 2.4 $\pm$ 0.4                           | 2.4 $\pm$ 0.1  | 0.38 / 0.44  |

Goat herds

| Vaccination performed |                | Vaccination not performed       |                | $p^1$           |
|-----------------------|----------------|---------------------------------|----------------|-----------------|
| 10-year average       | 2-year average | 10-year average                 | 2-year average |                 |
|                       |                | Temperature of Earth skin (°C)  |                |                 |
| 15.8                  | 16.3           | 16.1 $\pm$ 0.2                  | 16.4 $\pm$ 0.2 | 0.87 / 0.66     |
|                       |                | Temperature at 2 m (°C)         |                |                 |
| 15.4                  | 15.9           | 15.7 $\pm$ 0.2                  | 16.0 $\pm$ 0.2 | 0.83 / 0.60     |
|                       |                | Maximum temperature at 2 m (°C) |                |                 |
| 36.1                  | 35.1           | 37.7 $\pm$ 0.2                  | 36.5 $\pm$ 0.2 | 0.39 / < 0.0001 |
|                       |                | Minimum temperature at 2 m (°C) |                |                 |
| -0.0                  | -0.8           | -0.3 $\pm$ 0.5                  | -0.0 $\pm$ 0.5 | 0.64 / 0.13     |

|      |      |                                                      |            |                |
|------|------|------------------------------------------------------|------------|----------------|
| 42.2 | 39.9 | Temperature range at 2 m (°C)<br>42.2 ± 0.6          | 40.5 ± 0.6 | 0.97 / 0.32    |
| 69.4 | 69.7 | Relative humidity at 2 m (%)<br>68.9 ± 0.2           | 69.4 ± 0.2 | 0.72 / 0.13    |
| 1.7  | 1.8  | Precipitation (mm)<br>1.7 ± 0.0                      | 1.9 ± 0.0  | 0.83 / 0.001   |
| 2.7  | 2.8  | Wind speed at 10 m (m s <sup>-1</sup> )<br>2.4 ± 0.1 | 2.4 ± 0.1  | 0.66 / < 0.001 |

Farms with intensive or semi-intensive management

| Vaccination performed |                | Vaccination not performed                            |                | <i>p</i>            |
|-----------------------|----------------|------------------------------------------------------|----------------|---------------------|
| 10-year average       | 2-year average | 10-year average                                      | 2-year average |                     |
| 11.4 ± 1.0            | 12.0 ± 0.9     | Temperature of Earth skin (°C)<br>15.6 ± 0.1         | 15.9 ± 0.1     | 0.14 / 0.14         |
| 11.5 ± 0.8            | 12.0 ± 0.8     | Temperature at 2 m (°C)<br>15.3 ± 0.1                | 15.7 ± 0.1     | 0.13 / 0.13         |
| 35.8 ± 1.4            | 34.5 ± 1.5     | Maximum temperature at 2 m (°C)<br>38.3 ± 0.3        | 37.0 ± 0.3     | 0.32 / 0.34         |
| -13.2 ± 1.4           | -13.3 ± 2.3    | Minimum temperature at 2 m (°C)<br>-0.4 ± 0.3        | -0.2 ± 0.3     | 0.11 / 0.17         |
| 48.9 ± 0.1            | 47.8 ± 0.7     | Temperature range at 2 m (°C)<br>44.2 ± 0.3          | 42.8 ± 0.3     | < 0.0001 / < 0.0001 |
| 69.8 ± 0.3            | 69.1 ± 0.3     | Relative humidity at 2 m (%)<br>68.1 ± 0.1           | 68.5 ± 0.1     | 0.044 / 0.33        |
| 1.6 ± 0.1             | 1.6 ± 0.1      | Precipitation (mm)<br>1.7 ± 0.0                      | 1.9 ± 0.0      | 0.41 / 0.24         |
| 1.6 ± 0.1             | 1.6 ± 0.1      | Wind speed at 10 m (m s <sup>-1</sup> )<br>2.1 ± 0.1 | 2.1 ± 0.1      | 0.018 / 0.004       |

Farms with semi-extensive or extensive management

| Vaccination performed                        |                | Vaccination not performed |                | <i>p</i>            |
|----------------------------------------------|----------------|---------------------------|----------------|---------------------|
| 10-year average                              | 2-year average | 10-year average           | 2-year average |                     |
| <b>Temperature of Earth skin (°C)</b>        |                |                           |                |                     |
| 15.8                                         | 16.3           | 16.8 ± 0.2                | 17.1 ± 0.2     | < 0.0001 / < 0.0001 |
| <b>Temperature at 2 m (°C)</b>               |                |                           |                |                     |
| 15.4                                         | 15.9           | 16.2 ± 0.1                | 16.5 ± 0.1     | < 0.0001 / < 0.0001 |
| <b>Maximum temperature at 2 m (°C)</b>       |                |                           |                |                     |
| 36.1                                         | 35.1           | 37.2 ± 0.2                | 36.1 ± 0.2     | < 0.0001 / < 0.0001 |
| <b>Minimum temperature at 2 m (°C)</b>       |                |                           |                |                     |
| −0.0                                         | −0.8           | −0.8 ± 0.3                | −0.2 ± 0.4     | < 0.001 / < 0.0001  |
| <b>Temperature range at 2 m (°C)</b>         |                |                           |                |                     |
| 42.2                                         | 39.9           | 40.1 ± 0.5                | 38.3 ± 0.5     | < 0.0001 / 0.001    |
| <b>Relative humidity at 2 m (%)</b>          |                |                           |                |                     |
| 69.4                                         | 69.7           | 69.3 ± 0.1                | 69.9 ± 0.1     | 0.50 / 0.14         |
| <b>Precipitation (mm)</b>                    |                |                           |                |                     |
| 1.7                                          | 1.8            | 1.7 ± 0.0                 | 2.0 ± 0.0      | 0.025 / < 0.0001    |
| <b>Wind speed at 10 m (m s<sup>−1</sup>)</b> |                |                           |                |                     |
| 2.7                                          | 2.8            | 2.7 ± 0.1                 | 2.7 ± 0.1      | 0.85 / 0.14         |

1. xxx / zzz: p-value for comparison between farms in which vaccination was or was not performed for 10-year average / 2-year average

**Table S7.** Results of univariable analysis of climate conditions (mean  $\pm$  standard error of the mean) for associations with optional vaccination against foot-rot in 444 small ruminant farms in Greece.

Sheep flocks

| Vaccination performed                   |                | Vaccination not performed |                | <i>p</i> <sup>1</sup> |
|-----------------------------------------|----------------|---------------------------|----------------|-----------------------|
| 10-year average                         | 2-year average | 10-year average           | 2-year average |                       |
| Temperature of Earth skin (°C)          |                |                           |                |                       |
| 16.4 ± 0.6                              | 16.7 ± 0.6     | 16.2 ± 0.7                | 16.5 ± 0.1     | 0.83 / < 0.0001       |
| Temperature at 2 m (°C)                 |                |                           |                |                       |
| 15.9 ± 0.5                              | 16.1 ± 0.5     | 15.8 ± 0.8                | 16.1 ± 0.1     | 0.98 / < 0.0001       |
| Maximum temperature at 2 m (°C)         |                |                           |                |                       |
| 38.0 ± 1.0                              | 36.2 ± 1.1     | 37.7 ± 0.8                | 36.5 ± 0.2     | 0.80 / 0.036          |
| Minimum temperature at 2 m (°C)         |                |                           |                |                       |
| −0.4 ± 1.1                              | −0.1 ± 1.4     | −0.1 ± 0.6                | −0.7 ± 0.3     | 0.67 / 0.049          |
| Temperature range at 2 m (°C)           |                |                           |                |                       |
| 41.4 ± 2.0                              | 39.3 ± 2.4     | 42.2 ± 0.7                | 40.6 ± 0.3     | 0.63 / < 0.0001       |
| Relative humidity at 2 m (%)            |                |                           |                |                       |
| 69.3 ± 0.9                              | 70.4 ± 0.9     | 68.6 ± 0.5                | 69.1 ± 0.1     | 0.25 / < 0.0001       |
| Precipitation (mm)                      |                |                           |                |                       |
| 1.8 ± 0.1                               | 2.1 ± 0.1      | 1.7 ± 0.5                 | 1.9 ± 0.0      | 0.19 / 0.06           |
| Wind speed at 10 m (m s <sup>−1</sup> ) |                |                           |                |                       |
| 2.6± 0.4                                | 2.6 ± 0.4      | 2.4 ± 0.6                 | 2.4 ± 0.1      | 0.65 / < 0.0001       |

Goat herds

Farms with intensive or semi-intensive management

| Vaccination performed           |                | Vaccination not performed |                | <i>p</i>    |
|---------------------------------|----------------|---------------------------|----------------|-------------|
| 10-year average                 | 2-year average | 10-year average           | 2-year average |             |
| Temperature of Earth skin (°C)  |                |                           |                |             |
| 16.4 ± 0.7                      | 16.7 ± 0.8     | 15.6 ± 0.1                | 15.9 ± 0.1     | 0.32 / 0.40 |
| Temperature at 2 m (°C)         |                |                           |                |             |
| 15.9 ± 0.6                      | 16.1 ± 0.7     | 15.6 ± 0.1                | 15.7 ± 0.1     | 0.45 / 0.56 |
| Maximum temperature at 2 m (°C) |                |                           |                |             |
| 37.8 ± 1.3                      | 36.2 ± 1.4     | 38.3 ± 0.3                | 37.0 ± 0.3     | 0.75 / 0.59 |

|            |            |                                              |            |            |             |
|------------|------------|----------------------------------------------|------------|------------|-------------|
| -0.3 ± 1.4 | -0.9 ± 1.8 | <b>Minimum temperature at 2 m (°C)</b>       | -0.5 ± 0.3 | -0.3 ± 0.3 | 0.21 / 0.27 |
| 41.1 ± 2.6 | 39.0 ± 3.1 | <b>Temperature range at 2 m (°C)</b>         | 44.3 ± 0.3 | 42.8 ± 0.3 | 0.30 / 0.31 |
| 69.6 ± 1.2 | 70.7 ± 1.1 | <b>Relative humidity at 2 m (%)</b>          | 68.1 ± 0.1 | 68.5 ± 0.1 | 0.28 / 0.15 |
| 1.8 ± 0.1  | 2.1 ± 0.2  | <b>Precipitation (mm)</b>                    | 1.7 ± 0.0  | 1.9 ± 0.0  | 0.71 / 0.31 |
| 2.6 ± 0.5  | 2.6 ± 0.5  | <b>Wind speed at 10 m (m s<sup>-1</sup>)</b> | 2.1 ± 0.1  | 2.1 ± 0.1  | 0.32 / 0.31 |

Farms with semi-extensive or extensive management

| Vaccination performed                   |                | Vaccination not performed |                | <i>p</i>            |
|-----------------------------------------|----------------|---------------------------|----------------|---------------------|
| 10-year average                         | 2-year average | 10-year average           | 2-year average |                     |
| Temperature of Earth skin (°C)          |                |                           |                |                     |
| 16.41                                   | 16.6           | 16.8 ± 0.2                | 17.1 ± 0.2     | 0.021 / 0.005       |
| Temperature at 2 m (°C)                 |                |                           |                |                     |
| 15.93                                   | 16.1           | 16.2 ± 0.1                | 16.5 ± 0.1     | 0.05 / 0.004        |
| Maximum temperature at 2 m (°C)         |                |                           |                |                     |
| 38.63                                   | 36.6           | 37.2 ± 0.2                | 36.1 ± 0.2     | < 0.0001 / < 0.0001 |
| Minimum temperature at 2 m (°C)         |                |                           |                |                     |
| −0.9                                    | −0.7           | −0.8 ± 0.3                | −0.3 ± 0.4     | 0.001 / < 0.0001    |
| Temperature range at 2 m (°C)           |                |                           |                |                     |
| 42.5                                    | 40.3           | 40.0 ± 0.5                | 38.3 ± 0.5     | < 0.0001 / < 0.0001 |
| Relative humidity at 2 m (%)            |                |                           |                |                     |
| 68.4                                    | 69.3           | 69.3 ± 0.1                | 69.9 ± 0.1     | < 0.0001 / < 0.0001 |
| Precipitation (mm)                      |                |                           |                |                     |
| 1.9                                     | 2.3            | 1.7 ± 0.0                 | 2.0 ± 0.0      | < 0.0001 / 0.0001   |
| Wind speed at 10 m (m s <sup>−1</sup> ) |                |                           |                |                     |
| 2.3                                     | 2.3            | 2.7 ± 0.1                 | 2.7 ± 0.1      | < 0.0001 / < 0.0001 |

1. xxx / zzz: p-value for comparison between farms in which vaccination was or was not performed for 10-year average / 2-year average

**Table S8.** Results of univariable analysis of climate conditions (mean  $\pm$  standard error of the mean) for associations with optional vaccination against paratuberculosis in 444 small ruminant farms in Greece.

Sheep flocks

| Vaccination performed |                | Vaccination not performed               |                | <i>p</i> <sup>1</sup> |
|-----------------------|----------------|-----------------------------------------|----------------|-----------------------|
| 10-year average       | 2-year average | 10-year average                         | 2-year average |                       |
|                       |                | Temperature of Earth skin (°C)          |                |                       |
| 14.8 $\pm$ 0.7        | 14.8 $\pm$ 0.7 | 16.3 $\pm$ 0.1                          | 16.3 $\pm$ 0.1 | 0.09 / 0.09           |
|                       |                | Temperature at 2 m (°C)                 |                |                       |
| 14.5 $\pm$ 0.7        | 14.5 $\pm$ 0.7 | 15.8 $\pm$ 0.1                          | 15.8 $\pm$ 0.1 | 0.08 / 0.08           |
|                       |                | Maximum temperature at 2 m (°C)         |                |                       |
| 37.5 $\pm$ 0.6        | 37.5 $\pm$ 0.6 | 37.8 $\pm$ 0.7                          | 37.8 $\pm$ 0.7 | 0.73 / 0.73           |
|                       |                | Minimum temperature at 2 m (°C)         |                |                       |
| -0.6 $\pm$ 1.3        | -0.5 $\pm$ 1.4 | -0.0 $\pm$ 0.1                          | -0.0 $\pm$ 0.9 | 0.09 / 0.09           |
|                       |                | Temperature range at 2 m (°C)           |                |                       |
| 44.1 $\pm$ 1.0        | 44.1 $\pm$ 1.0 | 42.1 $\pm$ 0.1                          | 42.1 $\pm$ 0.3 | 0.09 / 0.09           |
|                       |                | Relative humidity at 2 m (%)            |                |                       |
| 69.5 $\pm$ 0.8        | 69.5 $\pm$ 0.8 | 68.6 $\pm$ 0.3                          | 68.6 $\pm$ 0.1 | 0.28 / 0.28           |
|                       |                | Precipitation (mm)                      |                |                       |
| 1.8 $\pm$ 0.1         | 1.8 $\pm$ 0.1  | 1.7 $\pm$ 0.8                           | 1.7 $\pm$ 0.0  | 0.83 / 0.83           |
|                       |                | Wind speed at 10 m (m s <sup>-1</sup> ) |                |                       |
| 2.3 $\pm$ 0.2         | 2.3 $\pm$ 0.2  | 2.4 $\pm$ 0.4                           | 2.4 $\pm$ 0.4  | 0.43 / 0.43           |

Goat herds

| Vaccination performed |                | Vaccination not performed       |                | <i>p</i>    |
|-----------------------|----------------|---------------------------------|----------------|-------------|
| 10-year average       | 2-year average | 10-year average                 | 2-year average |             |
|                       |                | Temperature of Earth skin (°C)  |                |             |
| 15.9 $\pm$ 0.4        | 15.9 $\pm$ 0.4 | 16.2 $\pm$ 0.3                  | 16.2 $\pm$ 0.3 | 0.64 / 0.64 |
|                       |                | Temperature at 2 m (°C)         |                |             |
| 15.5 $\pm$ 0.4        | 15.5 $\pm$ 0.4 | 15.7 $\pm$ 0.2                  | 15.7 $\pm$ 0.2 | 0.57 / 0.57 |
|                       |                | Maximum temperature at 2 m (°C) |                |             |
| 38.3 $\pm$ 0.4        | 38.3 $\pm$ 0.4 | 37.5 $\pm$ 0.3                  | 37.5 $\pm$ 0.3 | 0.10 / 0.10 |
|                       |                | Minimum temperature at 2 m (°C) |                |             |
| -0.8 $\pm$ 0.9        | -0.8 $\pm$ 0.9 | -0.2 $\pm$ 0.6                  | -0.1 $\pm$ 0.6 | 0.52 / 0.52 |

|            |            |                                         |            |            |             |
|------------|------------|-----------------------------------------|------------|------------|-------------|
| 43.1 ± 1.0 | 43.1 ± 1.0 | Temperature range at 2 m (°C)           | 41.6 ± 0.8 | 41.6 ± 0.8 | 0.26 / 0.26 |
| 68.6 ± 0.3 | 68.6 ± 0.3 | Relative humidity at 2 m (%)            | 69.0 ± 0.2 | 69.0 ± 0.2 | 0.30 / 0.30 |
| 1.7 ± 0.1  | 2.3 ± 0.1  | Precipitation (mm)                      | 1.7 ± 0.0  | 1.7 ± 0.0  | 0.79 / 0.79 |
| 2.3 ± 0.1  | 2.2 ± 0.1  | Wind speed at 10 m (m s <sup>-1</sup> ) | 2.5 ± 0.1  | 2.5 ± 0.1  | 0.42 / 0.42 |

Farms with intensive or semi-intensive management

| Vaccination performed |                | Vaccination not performed               |                | <i>p</i>      |
|-----------------------|----------------|-----------------------------------------|----------------|---------------|
| 10-year average       | 2-year average | 10-year average                         | 2-year average |               |
|                       |                | Temperature of Earth skin (°C)          |                |               |
| 14.1 ± 0.6            | 15.7 ± 0.1     | 14.1 ± 0.6                              | 15.7 ± 0.1     | 0.013 / 0.013 |
|                       |                | Temperature at 2 m (°C)                 |                |               |
| 14.0 ± 0.5            | 15.5 ± 0.1     | 14.0 ± 0.5                              | 15.5 ± 0.1     | 0.013 / 0.013 |
|                       |                | Maximum temperature at 2 m (°C)         |                |               |
| 37.9 ± 0.6            | 37.3 ± 0.3     | 37.9 ± 0.6                              | 37.3 ± 0.3     | 0.56 / 0.56   |
|                       |                | Minimum temperature at 2 m (°C)         |                |               |
| −0.9 ± 0.9            | −0.9 ± 0.3     | −0.9 ± 0.9                              | −0.9 ± 0.3     | 0.001 / 0.001 |
|                       |                | Temperature range at 2 m (°C)           |                |               |
| 46.7 ± 0.7            | 43.5 ± 0.3     | 46.7 ± 0.7                              | 43.5 ± 0.3     | 0.002 / 0.002 |
|                       |                | Relative humidity at 2 m (%)            |                |               |
| 68.7 ± 0.4            | 68.4 ± 0.2     | 68.7 ± 0.4                              | 68.4 ± 0.2     | 0.19 / 0.19   |
|                       |                | Precipitation (mm)                      |                |               |
| 1.7 ± 0.1             | 1.9 ± 0.0      | 1.7 ± 0.1                               | 1.9 ± 0.0      | 0.30 / 0.30   |
|                       |                | Wind speed at 10 m (m s <sup>−1</sup> ) |                |               |
| 2.0± 0.1              | 2.0 ± 0.1      | 2.0± 0.1                                | 2.0 ± 0.1      | 0.37 / 0.37   |

Farms with semi-extensive or extensive management

| Vaccination performed                        |                | Vaccination not performed |                | <i>p</i>      |
|----------------------------------------------|----------------|---------------------------|----------------|---------------|
| 10-year average                              | 2-year average | 10-year average           | 2-year average |               |
| <b>Temperature of Earth skin (°C)</b>        |                |                           |                |               |
| 16.6 ± 0.4                                   | 16.3 ± 0.2     | 16.6 ± 0.4                | 16.8 ± 0.2     | 0.68 / 0.68   |
| <b>Temperature at 2 m (°C)</b>               |                |                           |                |               |
| 16.0 ± 0.3                                   | 15.9 ± 0.2     | 16.0 ± 0.3                | 16.2 ± 0.1     | 0.61 / 0.61   |
| <b>Maximum temperature at 2 m (°C)</b>       |                |                           |                |               |
| 38.2 ± 0.4                                   | 36.6 ± 0.2     | 38.2 ± 0.4                | 37.1 ± 0.2     | 0.010 / 0.010 |
| <b>Minimum temperature at 2 m (°C)</b>       |                |                           |                |               |
| −0.1 ± 0.8                                   | −0.8 ± 0.4     | −0.1 ± 0.8                | −0.8 ± 0.4     | 0.73 / 0.73   |
| <b>Temperature range at 2 m (°C)</b>         |                |                           |                |               |
| 41.3 ± 1.0                                   | 40.4 ± 0.4     | 41.3 ± 1.0                | 39.9 ± 0.5     | 0.22 / 0.22   |
| <b>Relative humidity at 2 m (%)</b>          |                |                           |                |               |
| 68.9 ± 0.5                                   | 69.8 ± 0.2     | 68.9 ± 0.5                | 69.3 ± 0.1     | 0.39 / 0.39   |
| <b>Precipitation (mm)</b>                    |                |                           |                |               |
| 1.8 ± 0.1                                    | 2.0 ± 0.0      | 1.8 ± 0.1                 | 1.7 ± 0.0      | 0.52 / 0.52   |
| <b>Wind speed at 10 m (m s<sup>−1</sup>)</b> |                |                           |                |               |
| 2.5 ± 0.1                                    | 2.4 ± 0.1      | 2.5 ± 0.1                 | 2.7 ± 0.2      | 0.18 / 0.18   |

1. xxx / zzz: p-value for comparison between farms in which vaccination was or was not performed for 10-year average / 2-year average

**Table S9.** Results of univariable analysis of climate conditions (mean  $\pm$  standard error of the mean) for associations with optional vaccination against pneumonia in 444 small ruminant farms in Greece.

Sheep flocks

| Vaccination performed |                | Vaccination not performed               |                | <i>p</i> <sup>1</sup> |
|-----------------------|----------------|-----------------------------------------|----------------|-----------------------|
| 10-year average       | 2-year average | 10-year average                         | 2-year average |                       |
| 16.3 $\pm$ 0.2        | 16.5 $\pm$ 0.2 | Temperature of Earth skin (°C)          |                | 0.64 / 0.82           |
|                       |                | 16.2 $\pm$ 0.6                          | 16.5 $\pm$ 0.9 |                       |
| 15.8 $\pm$ 0.1        | 16.1 $\pm$ 0.2 | Temperature at 2 m (°C)                 |                | 0.66 / 0.87           |
|                       |                | 15.7 $\pm$ 0.7                          | 16.1 $\pm$ 0.9 |                       |
| 38.2 $\pm$ 0.2        | 36.9 $\pm$ 0.2 | Maximum temperature at 2 m (°C)         |                | 0.06 / 0.11           |
|                       |                | 37.4 $\pm$ 0.6                          | 36.2 $\pm$ 0.1 |                       |
| -0.9 $\pm$ 0.3        | -0.5 $\pm$ 0.2 | Minimum temperature at 2 m (°C)         |                | 0.57 / 0.44           |
|                       |                | -0.2 $\pm$ 0.4                          | -0.9 $\pm$ 0.4 |                       |
| 42.1 $\pm$ 0.5        | 40.4 $\pm$ 0.5 | Temperature range at 2 m (°C)           |                | 0.89 / 0.63           |
|                       |                | 42.2 $\pm$ 0.4                          | 40.7 $\pm$ 0.6 |                       |
| 68.8 $\pm$ 0.2        | 69.5 $\pm$ 0.2 | Relative humidity at 2 m (%)            |                | 0.19 / 0.022          |
|                       |                | 68.5 $\pm$ 0.5                          | 68.9 $\pm$ 0.2 |                       |
| 1.7 $\pm$ 0.0         | 1.9 $\pm$ 0.0  | Precipitation (mm)                      |                | 0.91 / 0.25           |
|                       |                | 1.7 $\pm$ 0.0                           | 1.9 $\pm$ 0.0  |                       |
| 2.4 $\pm$ 0.1         | 2.4 $\pm$ 0.1  | Wind speed at 10 m (m s <sup>-1</sup> ) |                | 0.75 / 0.75           |
|                       |                | 2.4 $\pm$ 0.1                           | 2.4 $\pm$ 0.1  |                       |

Goat herds

| Vaccination performed |                | Vaccination not performed       |                | <i>p</i>    |
|-----------------------|----------------|---------------------------------|----------------|-------------|
| 10-year average       | 2-year average | 10-year average                 | 2-year average |             |
| 16.5 $\pm$ 0.4        | 16.7 $\pm$ 0.4 | Temperature of Earth skin (°C)  |                | 0.27 / 0.34 |
|                       |                | 15.9 $\pm$ 0.3                  | 16.3 $\pm$ 0.2 |             |
| 16.0 $\pm$ 0.4        | 16.2 $\pm$ 0.4 | Temperature at 2 m (°C)         |                | 0.36 / 0.46 |
|                       |                | 15.5 $\pm$ 0.2                  | 15.9 $\pm$ 0.2 |             |
| 37.5 $\pm$ 0.5        | 36.4 $\pm$ 0.4 | Maximum temperature at 2 m (°C) |                | 0.57 / 0.71 |
|                       |                | 37.8 $\pm$ 0.3                  | 36.5 $\pm$ 0.2 |             |
| -0.2 $\pm$ 0.9        | -0.7 $\pm$ 1.0 | Minimum temperature at 2 m (°C) |                | 0.12 / 0.08 |
|                       |                | -0.9 $\pm$ 0.3                  | -0.6 $\pm$ 0.6 |             |

|            |            |                                         |            |            |               |
|------------|------------|-----------------------------------------|------------|------------|---------------|
| 40.7 ± 1.3 | 39.0 ± 1.3 | Temperature range at 2 m (°C)           | 42.7 ± 0.6 | 41.2 ± 0.7 | 0.18 / 0.14   |
| 69.5 ± 0.3 | 70.2 ± 0.3 | Relative humidity at 2 m (%)            | 68.6 ± 0.2 | 69.0 ± 0.2 | 0.013 / 0.003 |
| 1.7 ± 0.0  | 1.9 ± 0.1  | Precipitation (mm)                      | 1.8 ± 0.0  | 1.9 ± 0.0  | 0.13 / 0.50   |
| 2.7 ± 0.2  | 2.7 ± 0.2  | Wind speed at 10 m (m s <sup>-1</sup> ) | 2.3 ± 0.1  | 2.3 ± 0.1  | 0.07 / 0.08   |

Farms with intensive or semi-intensive management

| Vaccination performed |                | Vaccination not performed               |                | <i>p</i>       |
|-----------------------|----------------|-----------------------------------------|----------------|----------------|
| 10-year average       | 2-year average | 10-year average                         | 2-year average |                |
| 16.0 ± 0.2            | 16.3 ± 0.2     | Temperature of Earth skin (°C)          | 15.3 ± 0.2     | 0.0002 / 0.003 |
| 15.7 ± 0.1            | 16.0 ± 0.1     | Temperature at 2 m (°C)                 | 15.1 ± 0.1     | 0.004 / 0.006  |
| 38.8 ± 0.2            | 37.4 ± 0.2     | Maximum temperature at 2 m (°C)         | 37.9 ± 0.5     | 0.11 / 0.15    |
| -0.8 ± 0.3            | -0.4 ± 0.4     | Minimum temperature at 2 m (°C)         | -0.0 ± 0.4     | 0.020 / 0.009  |
| 43.6 ± 0.5            | 41.9 ± 0.4     | Temperature range at 2 m (°C)           | 44.8 ± 0.4     | 0.05 / 0.023   |
| 68.3 ± 0.2            | 68.8 ± 0.2     | Relative humidity at 2 m (%)            | 68.0 ± 0.2     | 0.36 / 0.11    |
| 1.7 ± 0.0             | 1.9 ± 0.0      | Precipitation (mm)                      | 1.7 ± 0.0      | 0.30 / 0.80    |
| 2.2 ± 0.1             | 2.2 ± 0.1      | Wind speed at 10 m (m s <sup>-1</sup> ) | 2.0 ± 0.1      | 0.029 / 0.027  |

Farms with semi-extensive or extensive management

| Vaccination performed                   |                | Vaccination not performed |                | <i>p</i>       |
|-----------------------------------------|----------------|---------------------------|----------------|----------------|
| 10-year average                         | 2-year average | 10-year average           | 2-year average |                |
| Temperature of Earth skin (°C)          |                |                           |                |                |
| 16.6 ± 0.3                              | 16.9 ± 0.3     | 16.9 ± 0.2                | 17.2 ± 0.2     | 0.49 / 0.32    |
| Temperature at 2 m (°C)                 |                |                           |                |                |
| 16.0 ± 0.2                              | 16.3 ± 0.2     | 16.3 ± 0.2                | 16.6 ± 0.2     | 0.40 / 0.24    |
| Maximum temperature at 2 m (°C)         |                |                           |                |                |
| 37.2 ± 0.3                              | 36.1 ± 0.3     | 37.2 ± 0.2                | 36.0 ± 0.2     | 0.70 / 0.79    |
| Minimum temperature at 2 m (°C)         |                |                           |                |                |
| −0.6 ± 0.5                              | −0.1 ± 0.6     | −0.9 ± 0.4                | −0.4 ± 0.5     | 0.73 / 0.63    |
| Temperature range at 2 m (°C)           |                |                           |                |                |
| 40.0 ± 0.8                              | 38.2 ± 0.8     | 40.1 ± 0.6                | 38.4 ± 0.6     | 0.92 / 0.80    |
| Relative humidity at 2 m (%)            |                |                           |                |                |
| 69.7 ± 0.2                              | 70.5 ± 0.2     | 68.9 ± 0.2                | 69.5 ± 0.2     | 0.014 / 0.0005 |
| Precipitation (mm)                      |                |                           |                |                |
| 1.7 ± 0.0                               | 2.0 ± 0.0      | 1.7 ± 0.0                 | 1.9 ± 0.1      | 0.89/ 0.20     |
| Wind speed at 10 m (m s <sup>−1</sup> ) |                |                           |                |                |
| 2.7± 0.1                                | 2.8 ± 0.1      | 2.7± 0.1                  | 2.7 ± 0.1      | 0.68 / 0.73    |

1. xxx / zzz: p-value for comparison between farms in which vaccination was or was not performed for 10-year average / 2-year average

**Table S10.** Results of univariable analysis of climate conditions (mean  $\pm$  standard error of the mean) for associations with optional vaccination against staphylococcal mastitis in 444 small ruminant farms in Greece.

Sheep flocks

| Vaccination performed |                | Vaccination not performed               |                | <i>p</i> <sup>1</sup> |
|-----------------------|----------------|-----------------------------------------|----------------|-----------------------|
| 10-year average       | 2-year average | 10-year average                         | 2-year average |                       |
|                       |                | Temperature of Earth skin (°C)          |                |                       |
| 16.1 $\pm$ 0.2        | 16.4 $\pm$ 0.2 | 16.1 $\pm$ 0.2                          | 16.5 $\pm$ 0.9 | 0.33 / 0.24           |
|                       |                | Temperature at 2 m (°C)                 |                |                       |
| 15.7 $\pm$ 0.1        | 16.0 $\pm$ 0.1 | 16.2 $\pm$ 0.1                          | 16.1 $\pm$ 0.9 | 0.42 / 0.28           |
|                       |                | Maximum temperature at 2 m (°C)         |                |                       |
| 38.2 $\pm$ 0.4        | 36.9 $\pm$ 0.4 | 36.3 $\pm$ 0.3                          | 36.2 $\pm$ 0.1 | 0.10 / 0.19           |
|                       |                | Minimum temperature at 2 m (°C)         |                |                       |
| -0.3 $\pm$ 0.3        | -0.0 $\pm$ 0.4 | -0.5 $\pm$ 0.4                          | -0.9 $\pm$ 0.4 | 0.55 / 0.36           |
|                       |                | Temperature range at 2 m (°C)           |                |                       |
| 43.0 $\pm$ 0.3        | 41.3 $\pm$ 0.5 | 40.1 $\pm$ 0.5                          | 40.7 $\pm$ 0.6 | 0.049 / 0.06          |
|                       |                | Relative humidity at 2 m (%)            |                |                       |
| 68.4 $\pm$ 0.2        | 69.0 $\pm$ 0.2 | 69.2 $\pm$ 0.2                          | 68.9 $\pm$ 0.2 | 0.17 / 0.43           |
|                       |                | Precipitation (mm)                      |                |                       |
| 1.8 $\pm$ 0.0         | 2.0 $\pm$ 0.0  | 1.9 $\pm$ 0.0                           | 1.9 $\pm$ 0.0  | 0.42 / 0.11           |
|                       |                | Wind speed at 10 m (m s <sup>-1</sup> ) |                |                       |
| 2.2 $\pm$ 0.1         | 2.2 $\pm$ 0.1  | 2.5 $\pm$ 0.1                           | 2.4 $\pm$ 0.1  | 0.008 / 0.007         |

Goat herds

| Vaccination performed |                | Vaccination not performed       |                | <i>p</i>    |
|-----------------------|----------------|---------------------------------|----------------|-------------|
| 10-year average       | 2-year average | 10-year average                 | 2-year average |             |
|                       |                | Temperature of Earth skin (°C)  |                |             |
| 15.6 $\pm$ 0.4        | 15.9 $\pm$ 0.4 | 16.3 $\pm$ 0.3                  | 16.6 $\pm$ 0.3 | 0.13 / 0.11 |
|                       |                | Temperature at 2 m (°C)         |                |             |
| 15.3 $\pm$ 0.3        | 15.6 $\pm$ 0.3 | 15.8 $\pm$ 0.2                  | 16.2 $\pm$ 0.2 | 0.16 / 0.12 |
|                       |                | Maximum temperature at 2 m (°C) |                |             |
| 38.1 $\pm$ 0.4        | 36.7 $\pm$ 0.4 | 37.5 $\pm$ 0.3                  | 36.4 $\pm$ 0.3 | 0.23 / 0.60 |
|                       |                | Minimum temperature at 2 m (°C) |                |             |
| -0.2 $\pm$ 0.8        | -0.0 $\pm$ 0.8 | -0.0 $\pm$ 0.3                  | -0.6 $\pm$ 0.6 | 0.25 / 0.16 |

|            |            |                                         |            |            |              |
|------------|------------|-----------------------------------------|------------|------------|--------------|
| 43.3 ± 1.1 | 41.7 ± 1.1 | Temperature range at 2 m (°C)           | 41.5 ± 0.6 | 40.0 ± 0.7 | 0.19 / 0.21  |
| 68.9 ± 0.3 | 69.5 ± 0.3 | Relative humidity at 2 m (%)            | 68.9 ± 0.2 | 69.3 ± 0.2 | 0.94 / 0.71  |
| 1.8 ± 0.1  | 2.0 ± 0.1  | Precipitation (mm)                      | 1.7 ± 0.0  | 1.9 ± 0.1  | 0.08 / 0.07  |
| 2.2 ± 0.1  | 2.2 ± 0.1  | Wind speed at 10 m (m s <sup>-1</sup> ) | 2.5 ± 0.1  | 2.5 ± 0.1  | 0.06 / 0.048 |

Farms with intensive or semi-intensive management

| Vaccination performed |                | Vaccination not performed               |                | <i>p</i>     |
|-----------------------|----------------|-----------------------------------------|----------------|--------------|
| 10-year average       | 2-year average | 10-year average                         | 2-year average |              |
|                       |                | Temperature of Earth skin (°C)          |                |              |
| 15.7 ± 0.1            | 16.0 ± 0.1     | 15.4 ± 0.2                              | 15.8 ± 0.2     | 0.27 / 0.36  |
|                       |                | Temperature at 2 m (°C)                 |                |              |
| 15.4 ± 0.1            | 15.8 ± 0.1     | 15.2 ± 0.1                              | 15.6 ± 0.2     | 0.24 / 0.34  |
|                       |                | Maximum temperature at 2 m (°C)         |                |              |
| 38.5 ± 0.5            | 37.2 ± 0.5     | 38.01 ± 0.4                             | 36.8 ± 0.4     | 0.43 / 0.56  |
|                       |                | Minimum temperature at 2 m (°C)         |                |              |
| −0.1 ± 0.3            | −0.0 ± 0.3     | −0.8 ± 0.4                              | −0.6 ± 0.4     | 0.18 / 0.24  |
|                       |                | Temperature range at 2 m (°C)           |                |              |
| 44.2 ± 0.4            | 42.7 ± 0.4     | 44.3 ± 0.4                              | 42.9 ± 0.5     | 0.89 / 0.76  |
|                       |                | Relative humidity at 2 m (%)            |                |              |
| 68.1 ± 0.2            | 68.7 ± 0.2     | 68.2 ± 0.4                              | 68.5 ± 0.2     | 0.78 / 0.56  |
|                       |                | Precipitation (mm)                      |                |              |
| 1.7 ± 0.0             | 2.0 ± 0.1      | 1.7 ± 0.0                               | 1.8 ± 0.0      | 0.71 / 0.79  |
|                       |                | Wind speed at 10 m (m s <sup>−1</sup> ) |                |              |
| 2.1± 0.1              | 2.2 ± 0.1      | 2.1± 0.1                                | 2.1 ± 0.1      | 0.78 / 0.027 |

Farms with semi-extensive or extensive management

| Vaccination performed                   |                | Vaccination not performed |                | <i>p</i>     |
|-----------------------------------------|----------------|---------------------------|----------------|--------------|
| 10-year average                         | 2-year average | 10-year average           | 2-year average |              |
| Temperature of Earth skin (°C)          |                |                           |                |              |
| 16.4 ± 0.3                              | 16.6 ± 0.3     | 17.2 ± 0.2                | 17.2 ± 0.2     | 0.16 / 0.11  |
| Temperature at 2 m (°C)                 |                |                           |                |              |
| 15.9 ± 0.3                              | 16.1 ± 0.3     | 16.6 ± 0.1                | 16.6 ± 0.2     | 0.15 / 0.09  |
| Maximum temperature at 2 m (°C)         |                |                           |                |              |
| 37.7 ± 0.3                              | 36.3 ± 0.3     | 36.0 ± 0.2                | 36.0 ± 0.2     | 0.09 / 0.35  |
| Minimum temperature at 2 m (°C)         |                |                           |                |              |
| -0.3 ± 0.6                              | -0.0 ± 0.7     | -0.0 ± 0.4                | -0.4 ± 0.5     | 0.37 / 0.24  |
| Temperature range at 2 m (°C)           |                |                           |                |              |
| 41.0 ± 0.9                              | 39.2 ± 0.9     | 38.0 ± 0.6                | 38.4 ± 0.6     | 0.21 / 0.22  |
| Relative humidity at 2 m (%)            |                |                           |                |              |
| 69.3 ± 0.3                              | 69.9 ± 0.3     | 69.8 ± 0.2                | 69.5 ± 0.2     | 0.98 / 0.77  |
| Precipitation (mm)                      |                |                           |                |              |
| 1.8 ± 0.1                               | 2.1 ± 0.1      | 1.9 ± 0.0                 | 1.9 ± 0.1      | 0.06 / 0.012 |
| Wind speed at 10 m (m s <sup>-1</sup> ) |                |                           |                |              |
| 2.5 ± 0.1                               | 2.5 ± 0.1      | 2.8 ± 0.1                 | 2.7 ± 0.1      | 0.11 / 0.026 |

1. xxx / zzz: p-value for comparison between farms in which vaccination was or was not performed for 10-year average / 2-year average

**Table S11.** Results of multivariable analysis of climate conditions for associations with optional vaccination against chlamydial abortion in 444 small ruminant farms in Greece.

Sheep flocks

| 10-year average                     |                                                   | 2-year average                      |                                                   |
|-------------------------------------|---------------------------------------------------|-------------------------------------|---------------------------------------------------|
| Variables                           | Regression coefficient<br>( $\pm$ standard error) | Variables                           | Regression coefficient<br>( $\pm$ standard error) |
| Wind speed at 10 m ( $p = 0.0006$ ) | $-0.262 \pm 0.076$                                | Wind speed at 10 m ( $p = 0.0009$ ) | $-0.261 \pm 0.078$                                |

Goat herds

| 10-year average               |                                                   | 2-year average                     |                                                   |
|-------------------------------|---------------------------------------------------|------------------------------------|---------------------------------------------------|
| Variables                     | Regression coefficient<br>( $\pm$ standard error) | Variables                          | Regression coefficient<br>( $\pm$ standard error) |
| Precipitation ( $p = 0.013$ ) | $0.328 \pm 0.130$                                 | Wind speed at 10 m ( $p = 0.018$ ) | $-0.110 \pm 0.046$                                |

Farms with intensive or semi-intensive management

Farms with semi-extensive or extensive management

| 10-year average                           |                                                   | 2-year average                     |                                                   |
|-------------------------------------------|---------------------------------------------------|------------------------------------|---------------------------------------------------|
| Variables                                 | Regression coefficient<br>( $\pm$ standard error) | Variables                          | Regression coefficient<br>( $\pm$ standard error) |
| Wind speed at 10 m ( $p < 0.0001$ )       | $-0.468 \pm 0.095$                                | Precipitation ( $p = 0.0009$ )     | $0.251 \pm 0.075$                                 |
| Temperature at 2 m ( $p = 0.0001$ )       | $0.145 \pm 0.037$                                 | Wind speed at 10 m ( $p = 0.047$ ) | $-0.110 \pm 0.046$                                |
| Relative humidity at 2 m ( $p = 0.0003$ ) | $0.098 \pm 0.027$                                 |                                    |                                                   |

**Table S12.** Results of multivariable analysis of climate conditions for associations with optional vaccination against clostridial infections in 444 small ruminant farms in Greece.

| <u>Sheep flocks</u>                                      |                                                   |                                            |                                                   |
|----------------------------------------------------------|---------------------------------------------------|--------------------------------------------|---------------------------------------------------|
| 10-year average                                          |                                                   | 2-year average                             |                                                   |
| Variables                                                | Regression coefficient<br>( $\pm$ standard error) | Variables                                  | Regression coefficient<br>( $\pm$ standard error) |
| Temperature of Earth skin ( $p < 0.0001$ )               | $-0.306 \pm 0.046$                                | Temperature of Earth skin ( $p < 0.0001$ ) | $-0.248 \pm 0.040$                                |
| Temperature at 2 m ( $p < 0.0001$ )                      | $0.347 \pm 0.053$                                 | Temperature at 2 m ( $p < 0.0001$ )        | $0.278 \pm 0.047$                                 |
| Relative humidity at 2 m ( $p < 0.0001$ )                | $0.027 \pm 0.007$                                 | Relative humidity at 2 m ( $p < 0.0001$ )  | $0.018 \pm 0.005$                                 |
| Precipitation ( $p = 0.011$ )                            | $-0.087 \pm 0.034$                                |                                            |                                                   |
| <u>Goat herds</u>                                        |                                                   |                                            |                                                   |
| <u>Farms with intensive or semi-intensive management</u> |                                                   |                                            |                                                   |
| <u>Farms with semi-extensive or extensive management</u> |                                                   |                                            |                                                   |
| 10-year average                                          |                                                   |                                            |                                                   |
| Variables                                                | Regression coefficient<br>( $\pm$ standard error) |                                            |                                                   |
| Temperature at 2 m ( $p < 0.0001$ )                      | $0.244 \pm 0.052$                                 |                                            |                                                   |
| Temperature of Earth skin ( $p < 0.0001$ )               | $-0.229 \pm 0.050$                                |                                            |                                                   |
| Wind speed at 10 m ( $p = 0.029$ )                       | $0.066 \pm 0.030$                                 |                                            |                                                   |

**Table S13.** Results of multivariable analysis of climate conditions for associations with optional vaccination against contagious agalactia in 444 small ruminant farms in Greece.

Sheep flocks

| 10-year average                          |                                                   | 2-year average                           |                                                   |
|------------------------------------------|---------------------------------------------------|------------------------------------------|---------------------------------------------------|
| Variables                                | Regression coefficient<br>( $\pm$ standard error) | Variables                                | Regression coefficient<br>( $\pm$ standard error) |
| Wind speed at 10 m ( $p < 0.0001$ )      | $-0.240 \pm 0.039$                                | Wind speed at 10 m ( $p < 0.0001$ )      | $-0.257 \pm 0.041$                                |
| Relative humidity at 2 m ( $p = 0.007$ ) | $0.034 \pm 0.015$                                 | Relative humidity at 2 m ( $p = 0.007$ ) | $0.041 \pm 0.015$                                 |

Goat herds

| 10-year average                     |                                                   | 2-year average                           |                                                   |
|-------------------------------------|---------------------------------------------------|------------------------------------------|---------------------------------------------------|
| Variables                           | Regression coefficient<br>( $\pm$ standard error) | Variables                                | Regression coefficient<br>( $\pm$ standard error) |
| Wind speed at 10 m ( $p = 0.0002$ ) | $-0.199 \pm 0.052$                                | Wind speed at 10 m ( $p < 0.0001$ )      | $-0.257 \pm 0.016$                                |
|                                     |                                                   | Relative humidity at 2 m ( $p = 0.007$ ) | $0.041 \pm 0.015$                                 |

Farms with intensive or semi-intensive management

| 10-year average                     |                                                   | 2-year average                     |                                                   |
|-------------------------------------|---------------------------------------------------|------------------------------------|---------------------------------------------------|
| Variables                           | Regression coefficient<br>( $\pm$ standard error) | Variables                          | Regression coefficient<br>( $\pm$ standard error) |
| Wind speed at 10 m ( $p < 0.0001$ ) | $-0.203 \pm 0.049$                                | Wind speed at 10 m ( $p = 0.009$ ) | $-0.277 \pm 0.105$                                |

Farms with semi-extensive or extensive management

| 10-year average                    |                                                   | 2-year average                     |                                                   |
|------------------------------------|---------------------------------------------------|------------------------------------|---------------------------------------------------|
| Variables                          | Regression coefficient<br>( $\pm$ standard error) | Variables                          | Regression coefficient<br>( $\pm$ standard error) |
| Temperature at 2 m ( $p = 0.003$ ) | $-0.179 \pm 0.060$                                | Temperature at 2 m ( $p = 0.001$ ) | $-0.170 \pm 0.053$                                |

|                                            |                    |                                            |                    |
|--------------------------------------------|--------------------|--------------------------------------------|--------------------|
| Maximum temperature at 2 m ( $p = 0.009$ ) | $-0.179 \pm 0.060$ | Maximum temperature at 2 m ( $p = 0.024$ ) | $-0.076 \pm 0.033$ |
| Temperature range at 2 m ( $p = 0.037$ )   | $-0.054 \pm 0.025$ | Temperature range at 2 m ( $p = 0.042$ )   | $0.034 \pm 0.017$  |

**Table S14.** Results of multivariable analysis of climate conditions for associations with optional vaccination against contagious ecthyma in 444 small ruminant farms in Greece.

| <u>Sheep flocks</u>                                      |                                                |
|----------------------------------------------------------|------------------------------------------------|
| 10-year average                                          | 2-year average                                 |
| Variables                                                | Regression coefficient<br>(± standard error)   |
| Minimum temperature at 2 m ( <i>p</i> = 0.0005)          | Minimum temperature at 2 m ( <i>p</i> = 0.023) |
|                                                          | −0.012 ± 0.004                                 |
| Maximum temperature at 2 m ( <i>p</i> = 0.014)           | Maximum temperature at 2 m ( <i>p</i> = 0.029) |
|                                                          | −0.004 ± 0.002                                 |
| Temperature range at 2 m ( <i>p</i> = 0.018)             | Temperature of Earth skin ( <i>p</i> = 0.041)  |
|                                                          | −0.007 ± 0.003                                 |
|                                                          | 0.045 ± 0.022                                  |
| <u>Goat herds</u>                                        |                                                |
| <u>Farms with intensive or semi-intensive management</u> |                                                |
|                                                          | 2-year average                                 |
|                                                          | Variables                                      |
|                                                          | Regression coefficient<br>(± standard error)   |
|                                                          | Temperature at 2 m ( <i>p</i> = 0.032)         |
|                                                          | −0.081 ± 0.037                                 |
| <u>Farms with semi-extensive or extensive management</u> |                                                |
| 10-year average                                          | 2-year average                                 |
| Variables                                                | Regression coefficient<br>(± standard error)   |
| Maximum temperature at 2 m ( <i>p</i> = 0.017)           | Maximum temperature at 2 m ( <i>p</i> = 0.038) |
|                                                          | −0.019 ± 0.008                                 |
| Temperature range at 2 m ( <i>p</i> = 0.032)             | Minimum temperature at 2 m ( <i>p</i> = 0.038) |
|                                                          | 0.013 ± 0.006                                  |
|                                                          | 4.222 ± 0.024                                  |
|                                                          | Temperature range at 2 m ( <i>p</i> = 0.038)   |
|                                                          | 4.228 ± 0.024                                  |

**Table S15.** Results of multivariable analysis of climate conditions for associations with optional vaccination against foot-rot in 444 small ruminant farms in Greece.

Sheep flocks

Goat herds

Farms with intensive or semi-intensive management

| 2-year average                           |                                              |
|------------------------------------------|----------------------------------------------|
| Variables                                | Regression coefficient<br>(± standard error) |
| Relative humidity at 2 m ( $p = 0.044$ ) | $0.009 \pm 0.004$                            |

Farms with semi-extensive or extensive management

| 10-year average                            |                                              |
|--------------------------------------------|----------------------------------------------|
| Variables                                  | Regression coefficient<br>(± standard error) |
| Maximum temperature at 2 m ( $p = 0.010$ ) | $-7.302 \pm 2.812$                           |
| Minimum temperature at 2 m ( $p = 0.010$ ) | $-7.302 \pm 2.813$                           |
| Temperature range at 2 m ( $p = 0.010$ )   | $-7.302 \pm 2.812$                           |

392 **Table S16.** Results of multivariable analysis of climate conditions for associations with optional vaccination against paratuberculosis in 444 small ruminant farms in Greece.

Sheep flocks

| 2-year average                     |                                              |
|------------------------------------|----------------------------------------------|
| Variables                          | Regression coefficient<br>(± standard error) |
| Temperature at 2 m ( $p = 0.046$ ) | $-0.074 \pm 0.038$                           |

Goat herds

Farms with intensive or semi-intensive management

| 10-year average                             |                                              |
|---------------------------------------------|----------------------------------------------|
| Variables                                   | Regression coefficient<br>(± standard error) |
| Minimum temperature at 2 m ( $p = 0.0001$ ) | $-0.018 \pm 0.004$                           |

Farms with semi-extensive or extensive management

| 10-year average                            |                                              |
|--------------------------------------------|----------------------------------------------|
| Variables                                  | Regression coefficient<br>(± standard error) |
| Maximum temperature at 2 m ( $p = 0.048$ ) | $-0.016 \pm 0.008$                           |

**Table S17.** Results of multivariable analysis of climate conditions for associations with optional vaccination against pneumonia in 444 small ruminant farms in Greece.

Sheep flocks

| 10-year average                             |                                                   | 2-year average                              |                                                   |
|---------------------------------------------|---------------------------------------------------|---------------------------------------------|---------------------------------------------------|
| Variables                                   | Regression coefficient<br>( $\pm$ standard error) | Variables                                   | Regression coefficient<br>( $\pm$ standard error) |
| Maximum temperature at 2 m ( $p = 0.0008$ ) | 0.028 $\pm$ 0.008                                 | Relative humidity at 2 m ( $p = 0.0002$ )   | -0.053 $\pm$ 0.014                                |
| Relative humidity at 2 m ( $p = 0.007$ )    | 0.041 $\pm$ 0.015                                 | Maximum temperature at 2 m ( $p = 0.0018$ ) | -0.026 $\pm$ 0.008                                |

Goat herds

| 10-year average                            |                                                   | 2-year average                           |                                                   |
|--------------------------------------------|---------------------------------------------------|------------------------------------------|---------------------------------------------------|
| Variables                                  | Regression coefficient<br>( $\pm$ standard error) | Variables                                | Regression coefficient<br>( $\pm$ standard error) |
| Relative humidity at 2 m ( $p = 0.0002$ )  | 0.133 $\pm$ 0.035                                 | Relative humidity at 2 m ( $p = 0.002$ ) | -0.093 $\pm$ 0.029                                |
| Minimum temperature at 2 m ( $p = 0.003$ ) | 0.093 $\pm$ 0.030                                 |                                          |                                                   |
| Temperature range at 2 m ( $p = 0.003$ )   | 0.080 $\pm$ 0.026                                 |                                          |                                                   |

Farms with intensive or semi-intensive management

| 10-year average                           |                                                   | 2-year average                             |                                                   |
|-------------------------------------------|---------------------------------------------------|--------------------------------------------|---------------------------------------------------|
| Variables                                 | Regression coefficient<br>( $\pm$ standard error) | Variables                                  | Regression coefficient<br>( $\pm$ standard error) |
| Temperature of Earth skin ( $p = 0.044$ ) | -0.302 $\pm$ 0.149                                | Relative humidity at 2 m ( $p = 0.018$ )   | -0.064 $\pm$ 0.027                                |
|                                           |                                                   | Maximum temperature at 2 m ( $p = 0.045$ ) | -0.016 $\pm$ 0.008                                |

Farms with semi-extensive or extensive management

| 10-year average                          |                                                   | 2-year average                            |                                                   |
|------------------------------------------|---------------------------------------------------|-------------------------------------------|---------------------------------------------------|
| Variables                                | Regression coefficient<br>( $\pm$ standard error) | Variables                                 | Regression coefficient<br>( $\pm$ standard error) |
| Relative humidity at 2 m ( $p = 0.014$ ) | $0.039 \pm 0.016$                                 | Relative humidity at 2 m ( $p = 0.0004$ ) | $0.055 \pm 0.015$                                 |

**Table S18.** Results of multivariable analysis of climate conditions for associations with optional vaccination against staphylococcal mastitis in 444 small ruminant farms in Greece.

| <u>Sheep flocks</u>                                      |                                              |                                               |                                              |
|----------------------------------------------------------|----------------------------------------------|-----------------------------------------------|----------------------------------------------|
| 10-year average                                          |                                              | 2-year average                                |                                              |
| Variables                                                | Regression coefficient<br>(± standard error) | Variables                                     | Regression coefficient<br>(± standard error) |
| Wind speed at 10 m ( <i>p</i> = 0.013)                   | −0.078 ± 0.031                               | Wind speed at 10 m ( <i>p</i> = 0.010)        | −0.246 ± 0.095                               |
| <u>Goat herds</u>                                        |                                              |                                               |                                              |
|                                                          |                                              | 2-year average                                |                                              |
|                                                          |                                              | Variables                                     | Regression coefficient<br>(± standard error) |
|                                                          |                                              | Wind speed at 10 m ( <i>p</i> = 0.044)        | −0.224 ± 0.110                               |
| <u>Farms with intensive or semi-intensive management</u> |                                              |                                               |                                              |
| <u>Farms with semi-extensive or extensive management</u> |                                              |                                               |                                              |
| 10-year average                                          |                                              | 2-year average                                |                                              |
| Variables                                                | Regression coefficient<br>(± standard error) | Variables                                     | Regression coefficient<br>(± standard error) |
| Temperature of Earth skin ( <i>p</i> = 0.009)            | 0.355 ± 0.134                                | Temperature at 2 m ( <i>p</i> = 0.002)        | −0.393 ± 0.127                               |
| Wind speed at 10 m ( <i>p</i> = 0.010)                   | −0.203 ± 0.078                               | Temperature of Earth skin ( <i>p</i> = 0.003) | 0.370 ± 0.121                                |
|                                                          |                                              | Precipitation ( <i>p</i> = 0.014)             | 0.193 ± 0.078                                |
|                                                          |                                              | Wind speed at 10 m ( <i>p</i> = 0.019)        | −0.174 ± 0.074                               |

**Table S19.** Results of univariable analysis of climate conditions (correlation coefficient, *r*) for associations with the total number of optional vaccinations in 444 small ruminant farms in Greece.

| <u>Overall</u>      |                                         |                |                     |
|---------------------|-----------------------------------------|----------------|---------------------|
| 10-year average     |                                         | 2-year average | <i>p</i>            |
| –0.203              | Temperature of Earth skin (°C)          | –0.213         | < 0.0001 / < 0.0001 |
| –0.199              | Temperature at 2 m (°C)                 | –0.203         | < 0.0001 / < 0.0001 |
| 0.151               | Maximum temperature at 2 m (°C)         | 0.124          | 0.001 / 0.009       |
| –0.179              | Minimum temperature at 2 m (°C)         | –0.184         | 0.0001 / < 0.0001   |
| 0.233               | Temperature range at 2 m (°C)           | 0.220          | < 0.0001 / < 0.0001 |
| –0.063              | Relative humidity at 2 m (%)            | –0.037         | 0.19 / 0.44         |
| 0.094               | Precipitation (mm)                      | 0.110          | 0.048 / 0.020       |
| –0.245              | Wind speed at 10 m (m s <sup>–1</sup> ) | –0.247         | < 0.0001 / < 0.0001 |
| <u>Sheep flocks</u> |                                         |                |                     |
| 10-year average     |                                         | 2-year average | <i>p</i>            |
| –0.224              | Temperature of Earth skin (°C)          | –0.234         | < 0.0001 / < 0.0001 |
| –0.207              | Temperature at 2 m (°C)                 | –0.220         | 0.0002 / < 0.0001   |
| 0.136               | Maximum temperature at 2 m (°C)         | 0.109          | 0.14 / 0.049        |
| –0.196              | Minimum temperature at 2 m (°C)         | –0.200         | 0.0004 / 0.0003     |
| 0.247               | Temperature range at 2 m (°C)           | 0.232          | < 0.0001 / 0.06     |

|        |                                         |        |                     |
|--------|-----------------------------------------|--------|---------------------|
|        | Relative humidity at 2 m (%)            |        |                     |
| −0.070 |                                         | −0.039 | 0.21 / 0.48         |
|        | Precipitation (mm)                      |        |                     |
| 0.094  |                                         | 0.122  | 0.09 / 0.028        |
|        | Wind speed at 10 m (m s <sup>−1</sup> ) |        |                     |
| −0.263 |                                         | −0.264 | < 0.0001 / < 0.0001 |

Goat herds

| 10-year average |                                         | 2-year average | <i>p</i>      |
|-----------------|-----------------------------------------|----------------|---------------|
|                 | Temperature of Earth skin (°C)          |                |               |
| −0.156          |                                         | −0.167         | 0.09 / 0.07   |
|                 | Temperature at 2 m (°C)                 |                |               |
| −0.152          |                                         | −0.166         | 0.10 / 0.07   |
|                 | Maximum temperature at 2 m (°C)         |                |               |
| 0.230           |                                         | 0.210          | 0.012 / 0.022 |
|                 | Minimum temperature at 2 m (°C)         |                |               |
| −0.144          |                                         | −0.148         | 0.12 / 0.11   |
|                 | Temperature range at 2 m (°C)           |                |               |
| 0.198           |                                         | 0.192          | 0.031 / 0.036 |
|                 | Relative humidity at 2 m (%)            |                |               |
| −0.036          |                                         | −0.027         | 0.70 / 0.77   |
|                 | Precipitation (mm)                      |                |               |
| 0.093           |                                         | 0.078          | 0.31 / 0.40   |
|                 | Wind speed at 10 m (m s <sup>−1</sup> ) |                |               |
| −0.198          |                                         | −0.204         | 0.031 / 0.026 |

Farms with intensive or semi-intensive management

| 10-year average |                                | 2-year average | <i>p</i>    |
|-----------------|--------------------------------|----------------|-------------|
|                 | Temperature of Earth skin (°C) |                |             |
| −0.038          |                                | −0.040         | 0.56 / 0.54 |
|                 | Temperature at 2 m (°C)        |                |             |
| −0.039          |                                | −0.043         | 0.55 / 0.51 |

|        |                                         |        |              |
|--------|-----------------------------------------|--------|--------------|
|        |                                         |        |              |
| 0.057  | Maximum temperature at 2 m (°C)         | 0.049  | 0.39 / 0.46  |
| −0.039 | Minimum temperature at 2 m (°C)         | −0.030 | 0.55 / 0.65  |
| 0.085  | Temperature range at 2 m (°C)           | 0.065  | 0.19 / 0.32  |
| 0.032  | Relative humidity at 2 m (%)            | 0.040  | 0.63 / 0.54  |
| −0.076 | Precipitation (mm)                      | −0.011 | 0.25 / 0.87  |
| −0.198 | Wind speed at 10 m (m s <sup>−1</sup> ) | −0.072 | 0.002 / 0.27 |

Farms with semi-extensive or extensive management

| 10-year average |                                         | 2-year average | <i>p</i>        |
|-----------------|-----------------------------------------|----------------|-----------------|
| −0.228          | Temperature of Earth skin (°C)          | −0.247         | 0.0009 / 0.0003 |
| −0.220          | Temperature at 2 m (°C)                 | −0.243         | 0.001 / 0.0004  |
| 0.244           | Maximum temperature at 2 m (°C)         | 0.195          | 0.0004 / 0.005  |
| −0.182          | Minimum temperature at 2 m (°C)         | 0.191          | 0.008 / 0.005   |
| 0.223           | Temperature range at 2 m (°C)           | 0.213          | 0.001 / 0.002   |
| 0.033           | Relative humidity at 2 m (%)            | 0.023          | 0.63 / 0.74     |
| 0.188           | Precipitation (mm)                      | 0.255          | 0.006 / 0.0002  |
| −0.246          | Wind speed at 10 m (m s <sup>−1</sup> ) | −0.250         | 0.0003 / 0.0003 |

1. xxx / zzz: p-value for comparison between farms in which vaccination was or was not performed for 10-year average / 2-year average

**Table S20.** Results of multivariable analysis of climate conditions for associations with the total number of optional vaccinations in 444 small ruminant farms in Greece.

| <u>Overall</u>                              |                                              |                                             |                                              |
|---------------------------------------------|----------------------------------------------|---------------------------------------------|----------------------------------------------|
| 10-year average                             |                                              | 2-year average                              |                                              |
| Variables                                   | Regression coefficient<br>(± standard error) | Variables                                   | Regression coefficient<br>(± standard error) |
| Relative humidity at 2 m ( $p < 0.0001$ )   | $-0.369 \pm 0.220$                           | Temperature at 2 m ( $p < 0.0001$ )         | $-0.428 \pm 0.108$                           |
| Minimum temperature at 2 m ( $p < 0.0001$ ) | $-0.204 \pm 0.041$                           | Wind speed at 10 m ( $p < 0.0001$ )         | $-0.603 \pm 0.144$                           |
| Wind speed at 10 m ( $p = 0.0002$ )         | $-0.878 \pm 0.231$                           | Minimum temperature at 2 m ( $p < 0.0001$ ) | $-0.206 \pm 0.050$                           |
| Maximum temperature at 2 m ( $p = 0.0004$ ) | $-0.074 \pm 0.021$                           | Maximum temperature at 2 m ( $p = 0.004$ )  | $-0.071 \pm 0.024$                           |
| Temperature range at 2 m ( $p = 0.002$ )    | $-0.117 \pm 0.038$                           |                                             |                                              |
| <u>Sheep flocks</u>                         |                                              |                                             |                                              |
| 10-year average                             |                                              | 2-year average                              |                                              |
| Variables                                   | Regression coefficient<br>(± standard error) | Variables                                   | Regression coefficient<br>(± standard error) |
| Minimum temperature at 2 m ( $p = 0.0003$ ) | $0.261 \pm 0.073$                            | Minimum temperature at 2 m ( $p = 0.0005$ ) | $-0.246 \pm 0.095$                           |
| Temperature of Earth skin ( $p = 0.0006$ )  | $-0.512 \pm 0.148$                           | Temperature of Earth skin ( $p = 0.0006$ )  | $-0.448 \pm 0.129$                           |
| Maximum temperature at 2 m ( $p = 0.002$ )  | $-0.092 \pm 0.030$                           | Wind speed at 10 m ( $p = 0.004$ )          | $-0.472 \pm 0.163$                           |
|                                             |                                              | Maximum temperature at 2 m ( $p = 0.004$ )  | $-0.076 \pm 0.029$                           |

Goat herds

| 10-year average                            |                                                   |
|--------------------------------------------|---------------------------------------------------|
| Variables                                  | Regression coefficient<br>( $\pm$ standard error) |
| Maximum temperature at 2 m ( $p = 0.033$ ) | $0.323 \pm 0.150$                                 |

Farms with intensive or semi-intensive managementFarms with semi-extensive or extensive management

| 10-year average                             |                                                   | 2-year average                              |                                                   |
|---------------------------------------------|---------------------------------------------------|---------------------------------------------|---------------------------------------------------|
| Variables                                   | Regression coefficient<br>( $\pm$ standard error) | Variables                                   | Regression coefficient<br>( $\pm$ standard error) |
| Maximum temperature at 2 m ( $p < 0.0001$ ) | $0.482 \pm 0.102$                                 | Minimum temperature at 2 m ( $p < 0.0001$ ) | $0.225 \pm 0.064$                                 |
| Temperature at 2 m ( $p < 0.0001$ )         | $-0.707 \pm 0.164$                                | Temperature at 2 m ( $p < 0.0001$ )         | $-0.447 \pm 0.129$                                |
| Temperature range at 2 m ( $p < 0.0001$ )   | $-0.291 \pm 0.071$                                | Wind speed at 10 m ( $p = 0.004$ )          | $-0.472 \pm 0.163$                                |
| Precipitation ( $p = 0.008$ )               | $0.697 \pm 0.259$                                 | Maximum temperature at 2 m ( $p = 0.009$ )  | $0.076 \pm 0.029$                                 |

**Figure S2.** Scatter plots of the total number of optional vaccinations versus the maximum temperature at 2 m (red dots) and the minimum temperature at 2 m (blue dots) in 444 small ruminant farms in Greece (dotted lines are respective trendlines).

(a) 10-year dataset

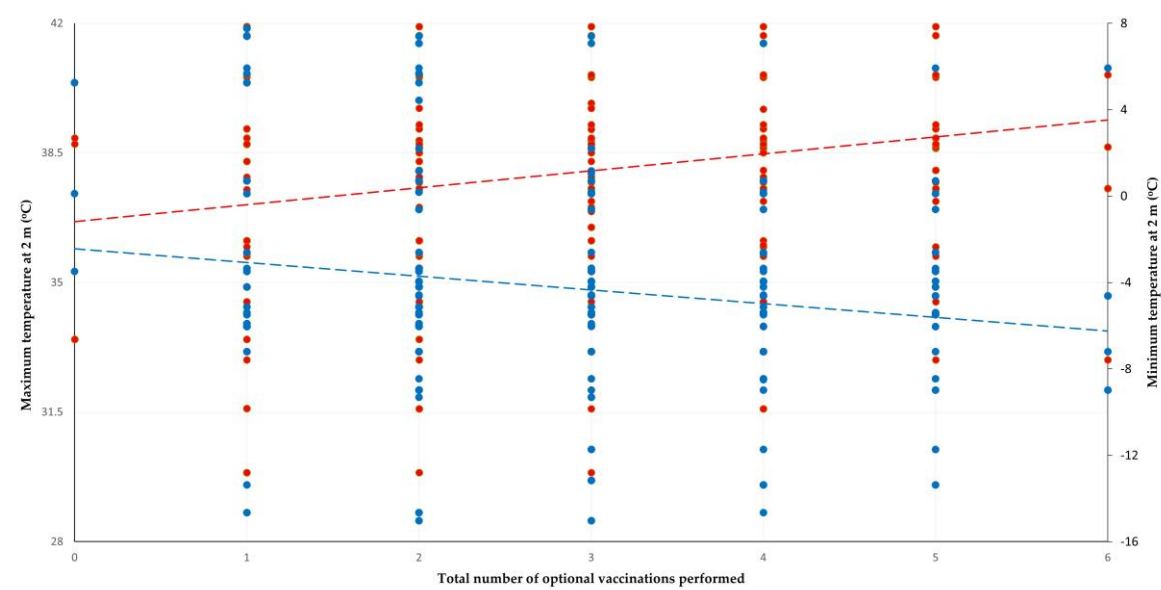

(b) 2-year dataset

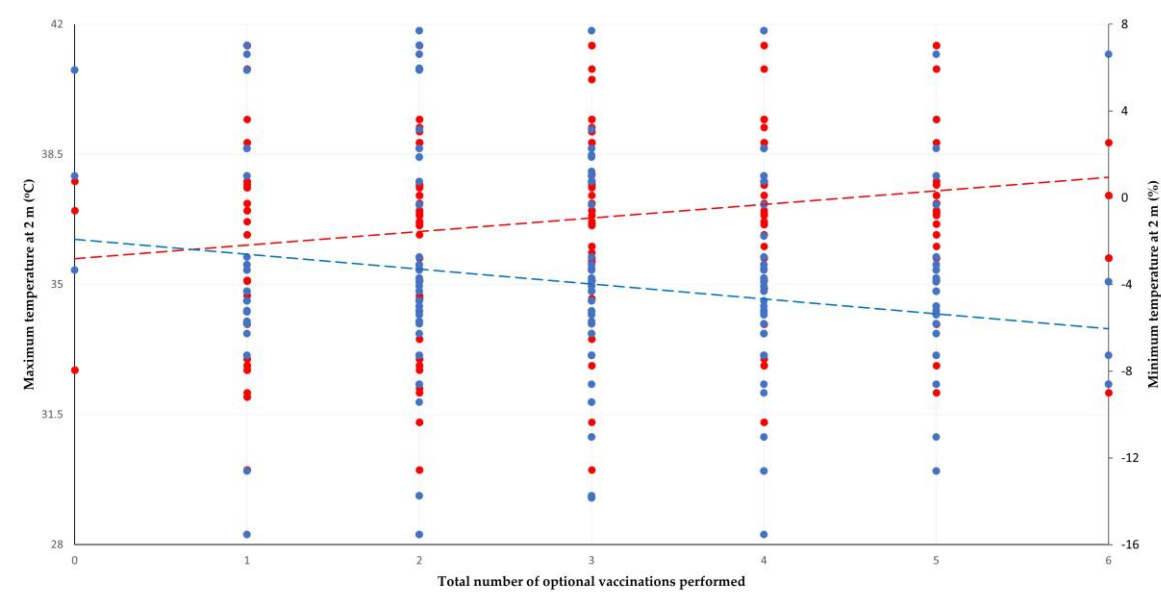

**Table S21.** Results of multivariable analysis for significant climatic, management-related or human resources-related parameters associated with optional vaccination against chlamydial abortion in 444 small ruminant farms in Greece.

| Parameters                                                                 | Odds Ratio <sup>1</sup>  | p-value  |
|----------------------------------------------------------------------------|--------------------------|----------|
| <u>Sheep flocks</u> – 10-year average                                      |                          |          |
| Age of newborns when taken away from dam                                   |                          | 0.0003   |
| ≤ 40 days (53.8% <sup>2</sup> )                                            | reference                | -        |
| 41–60 days (35.5%)                                                         | 2.123 (1.315–3.428)      | 0.002    |
| > 60 days (16.7%)                                                          | 5.833 (2.258–15.067)     | 0.0003   |
| Daily number of milking sessions                                           |                          | 0.001    |
| One (0.0%)                                                                 | 5.133 (0.201–131.421)    | 0.32     |
| Two (34.8%)                                                                | 3.229 (1.803–5.785)      | 0.0001   |
| Three (63.3%)                                                              | reference                | -        |
| Wind speed at 10 m                                                         |                          | 0.026    |
| per unit change                                                            | 0.932 ± 1.032            | 0.026    |
| <u>Sheep flocks</u> – 2-year average                                       |                          |          |
| Age of newborns when taken away from dam                                   |                          | 0.0006   |
| ≤ 40 days (53.8%)                                                          | reference                | -        |
| 41–60 days (35.5%)                                                         | 2.123 (1.315–3.428)      | 0.002    |
| > 60 days (16.7%)                                                          | 5.833 (2.258–15.067)     | 0.0003   |
| Daily number of milking sessions                                           |                          | 0.0009   |
| One (0.0%)                                                                 | 5.133 (0.201–131.421)    | 0.32     |
| Two (34.8%)                                                                | 3.229 (1.803–5.785)      | 0.0001   |
| Three (63.3%)                                                              | reference                | -        |
| Wind speed at 10 m                                                         |                          | 0.036    |
| per unit change                                                            | 0.936 ± 1.032            | 0.036    |
| <u>Goat herds</u> – 10-year average                                        |                          |          |
| No parameter emerged as significant                                        |                          |          |
| <u>Goat herds</u> – 2-year average                                         |                          |          |
| Average age of culling female animals                                      |                          | 0.001    |
| ≤ 6.5 years (52.0%)                                                        | reference                | -        |
| > 6.5 years (18.8%)                                                        | 4.667 (2.056 – 10.593)   | 0.0002   |
| Daily period spent by farmer at the farm                                   |                          | 0.002    |
| ≤ 8 hours (17.9%)                                                          | 2.744 (0.954 – 7.890)    | 0.06     |
| > 8 hours (37.4%)                                                          | reference                | -        |
| Daily number of milking sessions                                           |                          | 0.031    |
| One (25.0%)                                                                | 18.000 (0.812 – 399.177) | 0.07     |
| Two (29.6%)                                                                | 14.500 (1.648 – 123.188) | 0.016    |
| Three (85.7%)                                                              | reference                | -        |
| Breed of animals in the farm                                               |                          | 0.032    |
| Crossbreeds (38.9%)                                                        | 0.971 (0.326 – 2.895)    | 0.957    |
| Imported breeds (46.7%)                                                    | reference                | -        |
| Local breeds (20.0%)                                                       | 2.471 (1.050 – 5.814)    | 0.038    |
| Age of newborns when taken away from dam                                   |                          | 0.037    |
| ≤ 40 days (57.7%)                                                          | reference                | -        |
| 41 – 60 days (27.3%)                                                       | 3.636 (1.308 – 10.110)   | 0.013    |
| > 60 days (24.5%)                                                          | 4.205 (1.524 – 11.597)   | 0.006    |
| <u>Farms with intensive or semi-intensive management</u> – 10-year average |                          |          |
| Daily number of milking sessions                                           |                          | < 0.0001 |
| Two (70/176 = 39.8%)                                                       | 4.291 (2.080–8.850)      | 0.0001   |
| Three (34/46 = 73.9%)                                                      | reference                | -        |
| <u>Farms with intensive or semi-intensive management</u> – 2-year average  |                          |          |
| Daily number of milking sessions                                           |                          | < 0.0001 |
| Two (70/176 = 39.8%)                                                       | 4.291 (2.080–8.850)      | 0.0001   |
| Three (34/46 = 73.9%)                                                      | reference                | -        |
| <u>Farms with semi-extensive or extensive management</u> – 10-year average |                          |          |
| Wind speed at 10 m                                                         |                          | 0.0007   |

|                                                                           |                        |        |
|---------------------------------------------------------------------------|------------------------|--------|
| per unit change                                                           | 0.714 ± 1.103          | 0.0007 |
| Temperature at 2 m                                                        |                        | 0.006  |
| per unit change                                                           | 1.110 ± 1.038          | 0.006  |
| Relative humidity at 2 m                                                  |                        | 0.014  |
| per unit change                                                           | 1.070 ± 1.028          | 0.014  |
| Age of newborns when taken away from dam                                  |                        | 0.037  |
| ≤ 40 days (57.8%)                                                         | reference              | -      |
| 41 – 60 days (23.0%)                                                      | 4.579 (2.193 – 9.560)  | 0.0001 |
| > 60 days (20.3%)                                                         | 5.368 (2.297 – 12.548) | 0.0001 |
| Average age of culling female animals                                     |                        | 0.040  |
| ≤ 6.5 years (38.8%)                                                       | reference              | -      |
| > 7 years (16.1%)                                                         | 3.291 (1.707 – 6.345)  | 0.0004 |
| <b>Farms with semi-extensive or extensive management – 2-year average</b> |                        |        |
| Precipitation                                                             |                        | 0.007  |
| per unit change                                                           | -1.225 ± 0.075         | 0.007  |
| Average age of culling female animals                                     |                        | 0.010  |
| ≤ 6.5 years (38.8%)                                                       | reference              | -      |
| > 7 years (16.1%)                                                         | 3.291 (1.707 – 6.345)  | 0.0004 |
| Age of newborns when taken away from dam                                  |                        | 0.031  |
| ≤ 40 days (57.8%)                                                         | reference              | -      |
| 41 – 60 days (23.0%)                                                      | 4.579 (2.193 – 9.560)  | 0.0001 |
| > 60 days (20.3%)                                                         | 5.368 (2.297 – 12.548) | 0.0001 |

1 Odds ratios calculated against the highest prevalence associations of the variable.

2 Proportion of farms in which the event of interest was seen among those in which the studied variable prevailed.

**Table S22.** Results of multivariable analysis for significant climatic, management-related or human resources-related parameters associated with optional vaccination against clostridial infections in 444 small ruminant farms in Greece.

| Parameters                                                                 | Odds Ratio <sup>1</sup> | p-value  |
|----------------------------------------------------------------------------|-------------------------|----------|
| <u>Sheep flocks</u> – 10-year average                                      |                         |          |
| Temperature of Earth skin<br>per unit change                               | 0.739 ± 1.047           | < 0.0001 |
| Temperature at 2 m<br>per unit change                                      | 1.411 ± 1.054           | < 0.0001 |
| Relative humidity at 2 m<br>per unit change                                | 1.026 ± 1.007           | 0.0001   |
| Precipitation<br>per unit change                                           | –0.911 ± 1.034          | 0.006    |
| Family tradition in farming<br>Yes (97.9% <sup>2</sup> )                   | reference               | -        |
| No (92.9%)                                                                 | 3.551 (0.853–14.779)    | 0.08     |
| Age of farmers<br>≤50 years (99.0%)                                        | reference               | -        |
| >50 years (94.5%)                                                          | 5.641 (1.153–27.598)    | 0.033    |
| <u>Sheep flocks</u> – 2-year average                                       |                         |          |
| Temperature of Earth skin<br>per unit change                               | 0.806 ± 1.073           | < 0.0001 |
| Temperature at 2 m<br>per unit change                                      | 1.280 ± 0.043           | < 0.0001 |
| Relative humidity at 2 m<br>per unit change                                | 1.015 ± 0.005           | 0.005    |
| Family tradition in farming<br>Yes (97.9%)                                 | reference               | -        |
| No (92.9%)                                                                 | 3.551 (0.853–14.779)    | 0.08     |
| <u>Goat herds</u> – 10-year average                                        |                         |          |
| Family tradition in farming<br>Yes (100.0%)                                | reference               | -        |
| No (93.8%)                                                                 | 20.032 (0.781–513.999)  | 0.07     |
| <u>Goat herds</u> – 2-year average                                         |                         |          |
| Family tradition in farming<br>Yes (100.0%)                                | reference               | -        |
| No (93.8%)                                                                 | 20.032 (0.781–513.999)  | 0.07     |
| <u>Farms with intensive or semi-intensive management</u> – 10-year average |                         |          |
| No parameter emerged as significant                                        |                         |          |
| <u>Farms with intensive or semi-intensive management</u> – 2-year average  |                         |          |
| No parameter emerged as significant                                        |                         |          |
| <u>Farms with semi-extensive or extensive management</u> – 10-year average |                         |          |
| Temperature of Earth skin<br>per unit change                               | 0.752 ± 1.051           | < 0.0001 |
| Temperature at 2 m<br>per unit change                                      | 1.343 ± 1.053           | < 0.0001 |
| Family tradition in farming<br>Yes (54.2%)                                 | reference               | -        |
| No (25.0%)                                                                 | 22.111 (4.814–101.558)  | 0.0001   |
| Wind speed at 10 m<br>per unit change                                      | 1.102 ± 0.031           | 0.002    |
| Age of farmers<br>≤50 years (54.2% <sup>2</sup> )                          | reference               | -        |
| >50 years (25.0%)                                                          | 3.551 (0.701–17.993)    | 0.13     |

---

Farms with semi-extensive or extensive management – 2-year average

No parameter emerged as significant

---

1 Odds ratios calculated against the highest prevalence associations of the variable.

2 Proportion of farms in which the event of interest was seen among those in which the studied variable prevailed.

**Table S23.** Results of multivariable analysis for significant climatic, management-related or human resources-related parameters associated with optional vaccination against contagious agalactia in 444 small ruminant farms in Greece.

| Parameters                                                                 | Odds Ratio <sup>1</sup> | p-value            |
|----------------------------------------------------------------------------|-------------------------|--------------------|
| <u>Sheep flocks</u> – 10-year average                                      |                         |                    |
| Wind speed at 10 m<br>per unit change                                      | 0.853 ± 0.043           | 0.0002<br>0.0002   |
| Management system applied in farms                                         |                         | 0.001              |
| Intensive (81.8% <sup>2</sup> )                                            | reference               | -                  |
| Semi-intensive (63.6%)                                                     | 2.579 (1.113–5.972)     | 0.027              |
| Semi-extensive (50.0%)                                                     | 4.500 (1.927–10.509)    | 0.0005             |
| Extensive (12.0%)                                                          | 33.000 (7.905–137.760)  | < 0.0001           |
| Collaboration with a veterinarian                                          |                         | 0.032              |
| Yes (61.1%)                                                                | reference               | -                  |
| No (31.0%)                                                                 | 3.508 (1.748–7.040)     | 0.0004             |
| <u>Sheep flocks</u> – 2-year average                                       |                         |                    |
| Wind speed at 10 m<br>per unit change                                      | 0.840 ± 0.043           | < 0.0001<br>0.0001 |
| Management system applied in farms                                         |                         | 0.001              |
| Intensive (81.8% <sup>2</sup> )                                            | reference               | -                  |
| Semi-intensive (63.6%)                                                     | 2.579 (1.113–5.972)     | 0.027              |
| Semi-extensive (50.0%)                                                     | 4.500 (1.927–10.509)    | 0.0005             |
| Extensive (12.0%)                                                          | 33.000 (7.905–137.760)  | < 0.0001           |
| Relative humidity at 2 m<br>per unit change                                | 1.034 ± 0.015           | 0.030<br>0.030     |
| Collaboration with a veterinarian                                          |                         | 0.045              |
| Yes (61.1%)                                                                | reference               | -                  |
| No (31.0%)                                                                 | 3.508 (1.748–7.040)     | 0.0004             |
| <u>Goat herds</u> – 10-year average                                        |                         |                    |
| Use of laboratory diagnostic examinations in<br>samples of milk            |                         | 0.002              |
| Yes (88.0%)                                                                | reference               | -                  |
| No (45.7%)                                                                 | 8.698 (2.436–31.056)    | 0.0009             |
| Wind speed at 10 m<br>per unit change                                      | 0.885 ± 1046            | 0.012<br>0.012     |
| Collaboration with a veterinarian                                          |                         | 0.032              |
| Yes (60.8%)                                                                | reference               | -                  |
| No (17.6%)                                                                 | 7.233 (1.954–26.776)    | 0.003              |
| <u>Goat herds</u> – 2-year average                                         |                         |                    |
| Use of laboratory diagnostic examinations in<br>samples of milk            |                         | 0.002              |
| Yes (88.0%)                                                                | reference               | -                  |
| No (45.7%)                                                                 | 8.698 (2.436–31.056)    | 0.0009             |
| Wind speed at 10 m<br>per unit change                                      | 0.884 ± 1.045           | 0.006<br>0.006     |
| Collaboration with a veterinarian                                          |                         | 0.012              |
| Yes (60.8%)                                                                | reference               | -                  |
| No (17.6%)                                                                 | 7.233 (1.954–26.776)    | 0.003              |
| <u>Farms with intensive or semi-intensive management</u> – 10-year average |                         |                    |
| Wind speed at 10 m<br>per unit change                                      | 0.830 ± 1.051           | 0.0002<br>0.0002   |
| Duration of dry-period                                                     |                         | 0.047              |
| ≤2 months (75.8%)                                                          | Reference               | -                  |
| >2 months (61.0%)                                                          | 1.936 (1.067–3.512)     | 0.030              |

| <u>Farms with intensive or semi-intensive management – 2-year average</u>  |                      |          |
|----------------------------------------------------------------------------|----------------------|----------|
| Wind speed at 10 m                                                         |                      | 0.0006   |
| per unit change                                                            | 0.842 ± 1.051        | 0.0006   |
| Use of laboratory diagnostic examinations in samples of milk               |                      | 0.019    |
| Yes (83.6%)                                                                | reference            | -        |
| No (61.7%)                                                                 | 3.176 (1.457-6.925)  | 0.004    |
| <u>Farms with semi-extensive or extensive management – 10-year average</u> |                      |          |
| Collaboration with a veterinarian                                          |                      | < 0.0001 |
| Yes (53.3%)                                                                | reference            |          |
| No (12.2%)                                                                 | 8.229 (3.088-21.929) | < 0.0001 |
| Temperature at 2 m                                                         |                      | 0.002    |
| per unit change                                                            | 0.722 ± 1.085        | 0.002    |
| Maximum temperature at 2 m                                                 |                      | 0.008    |
| per unit change                                                            | -1.100 ± 1.036       | 0.008    |
| Use of laboratory diagnostic examinations in samples of milk               |                      | 0.015    |
| Yes (70.0%)                                                                | reference            | -        |
| No (40.7%)                                                                 | 3.405 (1.628-7.124)  | 0.001    |
| Temperature range at 2 m                                                   |                      | 0.015    |
| per unit change                                                            | -0.942 ± 1.025       | 0.015    |
| <u>Farms with semi-extensive or extensive management – 2-year average</u>  |                      |          |
| Collaboration with a veterinarian                                          |                      | 0.0001   |
| Yes (53.3%)                                                                | reference            |          |
| No (12.2%)                                                                 | 8.229 (3.088-21.929) | < 0.0001 |
| Temperature at 2 m                                                         |                      | 0.002    |
| per unit change                                                            | 0.856 ± 0.050        | 0.002    |
| Use of laboratory diagnostic examinations in samples of milk               |                      | 0.015    |
| Yes (70.0%)                                                                | reference            | -        |
| No (40.7%)                                                                 | 3.405 (1.628-7.124)  | 0.001    |
| Maximum temperature at 2 m                                                 |                      | 0.027    |
| per unit change                                                            | -1.074 ± 1.033       | 0.027    |
| Temperature range at 2 m                                                   |                      | 0.036    |
| per unit change                                                            | -0.958 ± 1.021       | 0.036    |

1 Odds ratios calculated against the highest prevalence associations of the variable.

2 Proportion of farms in which the event of interest was seen among those in which the studied variable prevailed.

**Table S24.** Results of multivariable analysis for significant climatic, management-related or human resources-related parameters associated with optional vaccination against contagious ecthyma in 444 small ruminant farms in Greece.

| Parameters                                                                 | Odds Ratio <sup>1</sup> | p-value |
|----------------------------------------------------------------------------|-------------------------|---------|
| <u>Sheep flocks</u> – 10-year average                                      |                         |         |
| Minimum temperature at 2 m<br>per unit change                              | 0.991 ± 1.003           | 0.0003  |
| Maximum temperature at 2 m<br>per unit change                              | 0.997 ± 1.001           | 0.031   |
| Temperature range at 2 m<br>per unit change                                | –0.996 ± 1.002          | 0.032   |
| Farmer's general education                                                 | reference               | 0.033   |
| Primary education (3.5% <sup>2</sup> )                                     |                         | -       |
| Secondary or post-secondary education (0.4%)                               | 8.109 (0.722–91.063)    | 0.09    |
| Tertiary education (0.0%)                                                  | 4.009 (0.188–85.667)    | 0.37    |
| <u>Sheep flocks</u> – 2-year average                                       |                         |         |
| Minimum temperature at 2 m<br>per unit change                              | 0.997 ± 1.001           | 0.0007  |
| Temperature range at 2 m<br>per unit change                                | –0.996 ± 1.002          | 0.039   |
| Maximum temperature at 2 m<br>per unit change                              | 0.991 ± 1.003           | 0.049   |
| <u>Goat herds</u> – 10-year average                                        |                         |         |
| No parameter emerged as significant                                        |                         |         |
| <u>Goat herds</u> – 2-year average                                         |                         |         |
| No parameter emerged as significant                                        |                         |         |
| <u>Farms with intensive or semi-intensive management</u> – 10-year average |                         |         |
| No parameter emerged as significant                                        |                         |         |
| <u>Farms with intensive or semi-intensive management</u> – 2-year average  |                         |         |
| Temperature at 2 m<br>per unit change                                      | 0.985 ± 1.004           | 0.0002  |
| <u>Farms with semi-extensive or extensive management</u> – 10-year average |                         |         |
| Farmer's general education                                                 | reference               | 0.025   |
| Primary education (4.8%)                                                   |                         | -       |
| Secondary or post-secondary education (0.0%)                               | 19.074 (0.898–405.208)  | 0.06    |
| Tertiary education (0.0%)                                                  | 3.148 (0.145–68.265)    | 0.47    |
| <u>Farms with semi-extensive or extensive management</u> – 2-year average  |                         |         |
| Farmer's general education                                                 | reference               | 0.016   |
| Primary education (4.8%)                                                   |                         | -       |
| Secondary or post-secondary education (0.0%)                               | 19.074 (0.898–405.208)  | 0.06    |
| Tertiary education (0.0%)                                                  | 3.148 (0.145–68.265)    | 0.47    |
| Maximum temperature at 2 m<br>per unit change                              | 0.019 ± 7.367           | 0.049   |
| Temperature range at 2 m<br>per unit change                                | –52.269 ± 7.367         | 0.049   |
| Minimum temperature at 2 m<br>per unit change                              | 52.199 ± 7.368          | 0.049   |

<sup>1</sup> Odds ratios calculated against the highest prevalence associations of the variable.

<sup>2</sup> Proportion of farms in which the event of interest was seen among those in which the studied variable prevailed.

**Table S25.** Results of multivariable analysis for significant climatic, management-related or human resources-related parameters associated with optional vaccination against foot-rot in 444 small ruminant farms in Greece.

| Parameters                                                                 | Odds Ratio <sup>1</sup> | p-value |
|----------------------------------------------------------------------------|-------------------------|---------|
| <u>Sheep flocks</u> – 10-year average                                      |                         |         |
| No parameter emerged as significant                                        |                         |         |
| <u>Sheep flocks</u> – 2-year average                                       |                         |         |
| No parameter emerged as significant                                        |                         |         |
| <u>Goat herds</u> – 10-year average                                        |                         |         |
| No parameter emerged as significant                                        |                         |         |
| <u>Goat herds</u> – 2-year average                                         |                         |         |
| No parameter emerged as significant                                        |                         |         |
| <u>Farms with intensive or semi-intensive management</u> – 10-year average |                         |         |
| Farmer's general education                                                 |                         | 0.022   |
| Primary education (0.0% <sup>2</sup> )                                     | 3.580 (0.180-71.361)    | 0.40    |
| Secondary or post-secondary education (0.8%)                               | 5.492 (0.600-53.875)    | 0.14    |
| Tertiary education (4.4%)                                                  | reference               | -       |
| <u>Farms with intensive or semi-intensive management</u> – 2-year average  |                         |         |
| Relative humidity at 2 m                                                   |                         | 0.044   |
| per unit change                                                            | -1.009 ± 0.004          | 0.044   |
| Farmer's general education                                                 |                         | 0.047   |
| Primary education (0.0%)                                                   | 3.580 (0.180-71.361)    | 0.40    |
| Secondary or post-secondary education (0.8%)                               | 5.492 (0.600-53.875)    | 0.14    |
| Tertiary education (4.4%)                                                  | reference               | -       |
| <u>Farms with semi-extensive or extensive management</u> – 10-year average |                         |         |
| Maximum temperature at 2 m                                                 |                         | 0.014   |
| per unit change                                                            | -1046.24 ± 16.481       | 0.014   |
| Temperature range at 2 m                                                   |                         | 0.014   |
| per unit change                                                            | -0.001 ± 16.483         | 0.014   |
| Minimum temperature at 2 m                                                 |                         | 0.049   |
| per unit change                                                            | 0.001 ± 16.486          | 0.049   |
| <u>Farms with semi-extensive or extensive management</u> – 2-year average  |                         |         |
| Farmer's general education                                                 |                         | 0.030   |
| Primary education (0.0%)                                                   |                         |         |
| Secondary or post-secondary education (0.0%)                               |                         |         |
| Tertiary education (1.7%)                                                  | reference               | -       |

<sup>1</sup> Odds ratios calculated against the highest prevalence associations of the variable.

<sup>2</sup> Proportion of farms in which the event of interest was seen among those in which the studied variable prevailed.

**Table S26.** Results of multivariable analysis for significant climatic, management-related or human resources-related parameters associated with optional vaccination against paratuberculosis in 444 small ruminant farms in Greece.

| Parameters                                                                 | Odds Ratio <sup>1</sup> | <i>p</i> -value |
|----------------------------------------------------------------------------|-------------------------|-----------------|
| <u>Sheep flocks</u> – 10-year average                                      |                         |                 |
| No parameter emerged as significant                                        |                         |                 |
| <u>Sheep flocks</u> – 2-year average                                       |                         |                 |
| No parameter emerged as significant                                        |                         |                 |
| <u>Goat herds</u> – 10-year average                                        |                         |                 |
| No parameter emerged as significant                                        |                         |                 |
| <u>Goat herds</u> – 2-year average                                         |                         |                 |
| No parameter emerged as significant                                        |                         |                 |
| <u>Farms with intensive or semi-intensive management</u> – 10-year average |                         |                 |
| Minimum temperature at 2 m<br>per unit change                              | 0.984 ± 1.004           | 0.0002          |
| <u>Farms with intensive or semi-intensive management</u> – 2-year average  |                         |                 |
| No parameter emerged as significant                                        |                         |                 |
| <u>Farms with semi-extensive or extensive management</u> – 10-year average |                         |                 |
| No parameter emerged as significant                                        |                         |                 |
| <u>Farms with semi-extensive or extensive management</u> – 2-year average  |                         |                 |
| No parameter emerged as significant                                        |                         |                 |

1 Odds ratios calculated against the highest prevalence associations of the variable.

**Table S27.** Results of multivariable analysis for significant climatic, management-related or human resources-related parameters associated with optional vaccination against pneumonia in 444 small ruminant farms in Greece.

| Parameters                                                                 | Odds Ratio <sup>1</sup> | <i>p</i> -value |
|----------------------------------------------------------------------------|-------------------------|-----------------|
| <u>Sheep flocks</u> – 10-year average                                      |                         |                 |
| Maximum temperature at 2 m<br>per unit change                              | –1.024 ± 0.008          | 0.002           |
| Routine administration of antibiotics to newborns                          |                         | 0.007           |
| Yes (58.6% <sup>2</sup> )                                                  | reference               | -               |
| No (40.4%)                                                                 | 2.086 (1.219–3.571)     | 0.007           |
| Relative humidity at 2 m<br>per unit change                                | –1.036 ± 0.015          | 0.018           |
| Daily period spent by farmer at the farm                                   |                         | 0.029           |
| ≤8 h (34.9%)                                                               | 1.813 (1.111–2.959)     | 0.017           |
| >8 h (48.7%)                                                               | reference               | -               |
| <u>Sheep flocks</u> – 2-year average                                       |                         |                 |
| Relative humidity at 2 m<br>per unit change                                | –1.050 ± 1.014          | 0.0005          |
| Maximum temperature at 2 m<br>per unit change                              | –1.027 ± 0.008          | 0.0007          |
| Routine administration of antibiotics to newborns                          |                         | 0.007           |
| Yes (58.6%)                                                                | reference               | -               |
| No (40.4%)                                                                 | 2.086 (1.219–3.571)     | 0.007           |
| Daily period spent by farmer at the farm                                   |                         | 0.030           |
| ≤8 h (34.9%)                                                               | 1.813 (1.111–2.959)     | 0.017           |
| >8 h (48.7%)                                                               | reference               | -               |
| <u>Goat herds</u> – 10-year average                                        |                         |                 |
| Relative humidity at 2 m<br>per unit change                                | –1.124 ± 0.035          | 0.001           |
| Minimum temperature at 2 m<br>per unit change                              | –1.084 ± 1.031          | 0.010           |
| Temperature range at 2 m<br>per unit change                                | 1.068 ± 0.026           | 0.014           |
| <u>Goat herds</u> – 2-year average                                         |                         |                 |
| No parameter emerged as significant                                        |                         |                 |
| <u>Farms with intensive or semi-intensive management</u> – 10-year average |                         |                 |
| Relative humidity at 2 m<br>per unit change                                | –1.057 ± 1.018          | 0.003           |
| Daily period spent by farmer at the farm                                   |                         | 0.047           |
| ≤8 h (34.9%)                                                               | 1.813 (1.111–2.959)     | 0.017           |
| >8 h (48.7%)                                                               | reference               | -               |
| <u>Farms with intensive or semi-intensive management</u> – 2-year average  |                         |                 |
| Relative humidity at 2 m<br>per unit change                                | –1.041 ± 0.018          | 0.024           |
| <u>Farms with semi-extensive or extensive management</u> – 10-year average |                         |                 |
| Relative humidity at 2 m<br>per unit change                                | –1.036 ± 0.016          | 0.028           |
| <u>Farms with semi-extensive or extensive management</u> – 2-year average  |                         |                 |
| Relative humidity at 2 m<br>per unit change                                | –1.052 ± 0.016          | 0.001           |

1 Odds ratios calculated against the highest prevalence associations of the variable.

2 Proportion of farms in which the event of interest was seen among those in which the studied variable prevailed.

**Table S28.** Results of multivariable analysis for significant climatic, management-related or human resources-related parameters associated with optional vaccination against staphylococcal mastitis in 444 small ruminant farms in Greece.

| Parameters                                                                 | Odds Ratio <sup>1</sup> | p-value  |
|----------------------------------------------------------------------------|-------------------------|----------|
| <u>Sheep flocks</u> – 10-year average                                      |                         |          |
| Use of laboratory diagnostic examinations in samples of milk               |                         | 0.005    |
| Yes (55.7% <sup>2</sup> )                                                  | reference               | -        |
| No (34.1%)                                                                 | 2.429 (1.419–4.161)     | 0.001    |
| Collaboration with a veterinarian                                          |                         | 0.017    |
| Yes (42.0%)                                                                | reference               | -        |
| No (16.7%)                                                                 | 3.628 (1.558–8.447)     | 0.003    |
| <u>Sheep flocks</u> – 2-year average                                       |                         |          |
| Use of laboratory diagnostic examinations in samples of milk               |                         | 0.007    |
| Yes (55.7% <sup>2</sup> )                                                  | reference               | -        |
| No (34.1%)                                                                 | 2.429 (1.419–4.161)     | 0.001    |
| Collaboration with a veterinarian                                          |                         | 0.010    |
| Yes (42.0%)                                                                | reference               | -        |
| No (16.7%)                                                                 | 3.628 (1.558–8.447)     | 0.003    |
| <u>Goat herds</u> – 10-year average                                        |                         |          |
| Type of milking mode                                                       |                         | 0.002    |
| Machine-milking (40.9%)                                                    | reference               | -        |
| Hand-milking (13.2%)                                                       | 4.550 (1.787–11.581)    | 0.002    |
| Daily period spent by farmer at the farm                                   |                         | 0.006    |
| ≤8 h (17.9%)                                                               | 2.152 (0.743–6.228)     | 0.16     |
| >8 h (31.9%)                                                               | reference               | -        |
| Daily number of milking sessions                                           |                         | 0.016    |
| One (0/4 = 0.0%)                                                           | 19.800 (0.744–527.292)  | 0.07     |
| Two (29/108 = 26.9%)                                                       | 6.810 (1.251–37.063)    | 0.027    |
| Three (5/7 = 71.4%)                                                        | reference               | -        |
| <u>Goat herds</u> – 2-year average                                         |                         |          |
| Type of milking mode                                                       |                         | 0.002    |
| Machine-milking (40.9%)                                                    | reference               | -        |
| Hand-milking (13.2%)                                                       | 4.550 (1.787–11.581)    | 0.002    |
| Daily period spent by farmer at the farm                                   |                         | 0.006    |
| ≤8 h (17.9%)                                                               | 2.152 (0.743–6.228)     | 0.16     |
| >8 h (31.9%)                                                               | reference               | -        |
| Daily number of milking sessions                                           |                         | 0.016    |
| One (0/4 = 0.0%)                                                           | 19.800 (0.744–527.292)  | 0.07     |
| Two (29/108 = 26.9%)                                                       | 6.810 (1.251–37.063)    | 0.027    |
| Three (5/7 = 71.4%)                                                        | reference               | -        |
| <u>Farms with intensive or semi-intensive management</u> – 10-year average |                         |          |
| Use of laboratory diagnostic examinations in samples of milk               |                         | 0.026    |
| Yes (55.7% <sup>2</sup> )                                                  | reference               | -        |
| No (34.1%)                                                                 | 2.429 (1.419–4.161)     | 0.001    |
| <u>Farms with intensive or semi-intensive management</u> – 2-year average  |                         |          |
| Use of laboratory diagnostic examinations in samples of milk               |                         | 0.026    |
| Yes (55.7% <sup>2</sup> )                                                  | reference               | -        |
| No (34.1%)                                                                 | 2.429 (1.419–4.161)     | 0.001    |
| <u>Farms with semi-extensive or extensive management</u> – 10-year average |                         |          |
| Type of milking mode                                                       |                         | 0.0002   |
| Machine-milking (39.5%)                                                    | reference               | -        |
| Hand-milking (11.8%)                                                       | 4.896 (2.418–9.915)     | < 0.0001 |

| Farms with semi-extensive or extensive management – 2-year average |                     |          |
|--------------------------------------------------------------------|---------------------|----------|
| Type of milking mode                                               |                     | < 0.0001 |
| Machine-milking (39.5%)                                            | reference           | -        |
| Hand-milking (11.8%)                                               | 4.896 (2.418–9.915) | < 0.0001 |
| Temperature at 2 m                                                 |                     | 0.0009   |
| per unit change                                                    | 0.666 ± 1.129       | 0.0009   |
| Temperature of Earth skin                                          |                     | 0.001    |
| per unit change                                                    | 1.471 ± 1.122       | 0.001    |
| Wind speed at 10 m                                                 |                     | 0.025    |
| per unit change                                                    | 0.852 ± 1.074       | 0.025    |
| Precipitation                                                      |                     | 0.030    |
| per unit change                                                    | -1.180 ± 1.078      | 0.030    |

1 Odds ratios calculated against the highest prevalence associations of the variable.

2 Proportion of farms in which the event of interest was seen among those in which the studied variable prevailed.

**Table S29.** Summary of multivariable analyses for outcomes regarding optional vaccinations in small ruminant farms in Greece.

| Outcome                                    | Farm                 | 10-year average                          |          | 2-year average                           |          |
|--------------------------------------------|----------------------|------------------------------------------|----------|------------------------------------------|----------|
|                                            |                      | Variable                                 | <i>p</i> | Variable                                 | <i>p</i> |
| Vaccination against chlamydial abortion    | S <sup>1</sup>       | Age of newborns when taken away from dam | 0.0003   | Age of newborns when taken away from dam | 0.0006   |
|                                            |                      | Daily number of milking sessions         | 0.001    | Daily number of milking sessions         | 0.0009   |
|                                            |                      | Wind speed at 10 m                       | 0.026    | Wind speed at 10 m                       | 0.036    |
|                                            | G <sup>1</sup>       | --                                       |          | Average age of culling female animals    | 0.001    |
|                                            |                      |                                          |          | Daily period spent by farmer at the farm | 0.002    |
|                                            |                      |                                          |          | Daily number of milking sessions         | 0.031    |
|                                            |                      |                                          |          | Breed of animals in the farm             | 0.032    |
|                                            |                      |                                          |          | Age of newborns when taken away from dam | 0.037    |
|                                            | I & s-I <sup>1</sup> | Daily number of milking sessions         | < 0.0001 | Daily number of milking sessions         | < 0.0001 |
|                                            | s-E & E <sup>1</sup> | Wind speed at 10 m                       | 0.0007   | Precipitation                            | 0.007    |
|                                            |                      | Temperature at 2 m                       | 0.006    | Average age of culling female animals    | 0.010    |
|                                            |                      | Relative humidity at 2 m                 | 0.014    | Age of newborns when taken away from dam | 0.031    |
|                                            |                      | Age of newborns when taken away from dam | 0.037    |                                          |          |
|                                            |                      | Average age of culling female animals    | 0.040    |                                          |          |
|                                            |                      |                                          |          |                                          |          |
|                                            |                      |                                          |          |                                          |          |
| Vaccination against clostridial infections | S                    | Temperature of Earth skin                | < 0.0001 | Temperature of Earth skin                | < 0.0001 |
|                                            |                      | Temperature at 2 m                       | < 0.0001 | Temperature at 2 m                       | < 0.0001 |
|                                            |                      | Relative humidity at 2 m                 | 0.0001   | Relative humidity at 2 m                 | 0.005    |
|                                            |                      | Precipitation                            | 0.006    | Family tradition in farming              | 0.016    |
|                                            |                      | Family tradition in farming              | 0.014    |                                          |          |
|                                            |                      | Age of farmers                           | 0.048    |                                          |          |
|                                            | G                    | Family tradition in farming              | 0.011    | Family tradition in farming              | 0.011    |
|                                            | I & s-I              | --                                       |          | --                                       |          |
|                                            | s-E & E              | Temperature of Earth skin                | < 0.0001 |                                          |          |
|                                            |                      | Temperature at 2 m                       | < 0.0001 |                                          |          |
|                                            |                      | Family tradition in farming              | 0.0002   |                                          |          |
|                                            |                      | Wind speed at 10 m                       | 0.002    |                                          |          |
|                                            |                      | Age of farmers                           | 0.026    |                                          |          |

|                                          |         |                                                              |          |                                                              |          |
|------------------------------------------|---------|--------------------------------------------------------------|----------|--------------------------------------------------------------|----------|
| Vaccination against contagious agalactia | S       | Wind speed at 10 m                                           | 0.0002   | Wind speed at 10 m                                           | < 0.0001 |
|                                          |         | Management system applied in farms                           | 0.001    | Management system applied in farms                           | 0.001    |
|                                          |         | Collaboration with a veterinarian                            | 0.032    | Relative humidity at 2 m                                     | 0.030    |
|                                          |         |                                                              |          | Collaboration with a veterinarian                            | 0.045    |
|                                          | G       | Use of laboratory diagnostic examinations in samples of milk | 0.002    | Use of laboratory diagnostic examinations in samples of milk | 0.002    |
|                                          |         | Wind speed at 10 m                                           | 0.012    | Wind speed at 10 m                                           | 0.006    |
|                                          |         | Collaboration with a veterinarian                            | 0.032    | Collaboration with a veterinarian                            | 0.012    |
|                                          | I & s-I | Wind speed at 10 m                                           | 0.0002   | Wind speed at 10 m                                           | 0.0006   |
|                                          |         | Duration of dry-period                                       | 0.047    | Use of laboratory diagnostic examinations in samples of milk | 0.019    |
|                                          | s-E & E | Collaboration with a veterinarian                            | < 0.0001 | Collaboration with a veterinarian                            | 0.0001   |
|                                          |         | Temperature at 2 m                                           | 0.002    | Temperature at 2 m                                           | 0.002    |
|                                          |         | Maximum temperature at 2 m                                   | 0.008    | Use of laboratory diagnostic examinations in samples of milk | 0.015    |
|                                          |         | Use of laboratory diagnostic examinations in samples of milk | 0.015    | Maximum temperature at 2 m                                   | 0.027    |
|                                          |         | Temperature range at 2 m                                     | 0.015    | Temperature range at 2 m                                     | 0.036    |
| Vaccination against contagious ecthyma   | S       | Minimum temperature at 2 m                                   | 0.0003   | Minimum temperature at 2 m                                   | 0.0007   |
|                                          |         | Maximum temperature at 2 m                                   | 0.031    | Temperature range at 2 m                                     | 0.039    |
|                                          |         | Temperature range at 2 m                                     | 0.032    | Maximum temperature at 2 m                                   | 0.049    |
|                                          |         | Farmer's general education                                   | 0.033    |                                                              |          |
|                                          | G       | --                                                           |          | --                                                           |          |
|                                          | I & s-I | --                                                           |          | Temperature at 2 m                                           | 0.0002   |
|                                          | s-E & E | Farmer's general education                                   | 0.025    | Farmer's general education                                   | 0.016    |
|                                          |         |                                                              |          | Maximum temperature at 2 m                                   | 0.049    |
|                                          |         |                                                              |          | Temperature range at 2 m                                     | 0.049    |
| Vaccination against foot-rot             | S       | --                                                           |          | --                                                           |          |
|                                          | G       | --                                                           |          | --                                                           |          |
|                                          | I & s-I | Farmer's general education                                   | 0.022    | Relative humidity at 2 m                                     | 0.044    |
|                                          |         |                                                              |          | Farmer's general education                                   | 0.047    |
|                                          | s-E & E | Maximum temperature at 2 m                                   | 0.014    | Farmer's general education                                   | 0.030    |
|                                          |         | Temperature range at 2 m                                     | 0.014    |                                                              |          |
| Vaccination against paratuberculosis     | S       | --                                                           |          | --                                                           |          |
|                                          | G       | --                                                           |          | --                                                           |          |
|                                          | I & s-I | Minimum temperature at 2 m                                   | 0.0002   | --                                                           |          |
|                                          | s-E & E | --                                                           |          | --                                                           |          |

|                                             |         |                                                              |        |                                                              |         |
|---------------------------------------------|---------|--------------------------------------------------------------|--------|--------------------------------------------------------------|---------|
| Vaccination against pneumonia               | S       | Maximum temperature at 2 m                                   | 0.002  | Relative humidity at 2m                                      | 0.0005  |
|                                             |         | Routine administration of antibiotics to newborns            | 0.007  | Maximum temperature at 2 m                                   | 0.0007  |
|                                             |         | Relative humidity at 2 m                                     | 0.018  | Routine administration of antibiotics to newborns            | 0.007   |
|                                             |         | Daily period spent by farmer at the farm                     | 0.029  | Daily period spent by farmer at the farm                     | 0.030   |
|                                             | G       | Relative humidity at 2 m                                     | 0.001  | --                                                           |         |
|                                             |         | Minimum temperature at 2 m                                   | 0.010  |                                                              |         |
|                                             | I & s-I | Temperature range at 2 m                                     | 0.014  | Relative humidity at 2 m                                     | 0.024   |
|                                             |         | Relative humidity at 2 m                                     | 0.003  |                                                              |         |
|                                             |         | Daily period spent by farmer at the farm                     | 0.047  |                                                              |         |
| Vaccination against staphylococcal mastitis | s-E & E | Relative humidity at 2 m                                     | 0.028  | Relative humidity at 2 m                                     | 0.001   |
|                                             | S       | Use of laboratory diagnostic examinations in samples of milk | 0.005  | Use of laboratory diagnostic examinations in samples of milk | 0.007   |
|                                             |         | Collaboration with a veterinarian                            | 0.017  | Collaboration with a veterinarian                            | 0.010   |
|                                             | G       | Type of milking mode                                         | 0.002  | Type of milking mode                                         | 0.002   |
|                                             |         | Daily period spent by farmer at the farm                     | 0.006  | Daily period spent by farmer at the farm                     | 0.006   |
|                                             |         | Daily number of milking sessions                             | 0.016  | Daily number of milking sessions                             | 0.016   |
|                                             | I & s-I | Use of laboratory diagnostic examinations in samples of milk | 0.026  | Use of laboratory diagnostic examinations in samples of milk | 0.026   |
|                                             |         | Type of milking mode                                         | 0.0002 | Type of milking mode                                         | <0.0001 |
|                                             | s-E & E |                                                              |        | Temperature at 2 m                                           | 0.0009  |
|                                             |         |                                                              |        | Temperature of Earth skin                                    | 0.001   |
|                                             |         |                                                              |        | Wind speed at 10 m                                           | 0.025   |
|                                             |         |                                                              |        | Precipitation                                                | 0.030   |

1 S: sheep, G: goat, I: intensive, E: extensive, s: semi.

**Table S30.** Results of multivariable analysis for significant climatic, management-related or human resources-related parameters associated with total number of optional vaccinations in 444 small ruminant farms in Greece.

| Parameters                                                                 | Odds Ratio <sup>1</sup> | p-value |
|----------------------------------------------------------------------------|-------------------------|---------|
| <u>Sheep flocks</u> – 10-year average                                      |                         |         |
| Management system applied in farms                                         |                         | 0.004   |
| per unit change                                                            | 0.766 ± 1.099           | 0.004   |
| Temperature of Earth skin                                                  |                         | 0.006   |
| per unit change                                                            | 0.690 ± 1.120           | 0.006   |
| Temperature at 2 m                                                         |                         | 0.007   |
| per unit change                                                            | 1.076 ± 1.030           | 0.007   |
| Age of newborns when taken away from dam                                   |                         | 0.010   |
| per unit change                                                            | 0.760 ± 1.112           | 0.010   |
| Minimum temperature at 2 m                                                 |                         | 0.013   |
| per unit change                                                            | 1.188 ± 0.069           | 0.013   |
| Routine administration of antibiotics to newborns                          |                         | 0.015   |
| per unit change                                                            | 0.667 ± 1.179           | 0.015   |
| Daily number of milking sessions                                           |                         | 0.016   |
| per unit change                                                            | 1.512 ± 1.186           | 0.016   |
| Use of laboratory diagnostic examinations in samples of milk               |                         | 0.019   |
| per unit change                                                            | 1.469 ± 1.177           | 0.019   |
| <u>Sheep flocks</u> – 2-year average                                       |                         |         |
| Temperature of Earth skin                                                  |                         | 0.001   |
| per unit change                                                            | 0.672 ± 1.129           | 0.001   |
| Management system applied in farms                                         |                         | 0.002   |
| per unit change                                                            | 0.775 ± 1.095           | 0.002   |
| Minimum temperature at 2 m                                                 |                         | 0.004   |
| per unit change                                                            | 1.185 ± 1.060           | 0.004   |
| Temperature at 2 m                                                         |                         | 0.004   |
| per unit change                                                            | 1.076 ± 1.027           | 0.004   |
| Age of newborns when taken away from dam                                   |                         | 0.008   |
| per unit change                                                            | 0.754 ± 1.110           | 0.008   |
| Daily number of milking sessions                                           |                         | 0.008   |
| per unit change                                                            | 1.571 ± 1.186           | 0.008   |
| Routine administration of antibiotics to newborns                          |                         | 0.010   |
| per unit change                                                            | 0.654 ± 1.177           | 0.010   |
| Use of laboratory diagnostic examinations in samples of milk               |                         | 0.017   |
| per unit change                                                            | 1.477 ± 1.176           | 0.017   |
| <u>Goat herds</u> – 10-year average                                        |                         |         |
| Maximum temperature at 2 m                                                 |                         | 0.006   |
| per unit change                                                            | 1.143 ± 1.049           | 0.006   |
| <u>Goat herds</u> – 2-year average                                         |                         |         |
| No parameter emerged as significant                                        |                         |         |
| <u>Farms with intensive or semi-intensive management</u> – 10-year average |                         |         |
| Daily number of milking sessions                                           |                         | 0.003   |
| per unit change                                                            | 1.802 ± 1.220           | 0.003   |
| <u>Farms with intensive or semi-intensive management</u> – 2-year average  |                         |         |
| Daily number of milking sessions                                           |                         | 0.003   |
| per unit change                                                            | 1.802 ± 1.220           | 0.003   |
| <u>Farms with semi-extensive or extensive management</u> – 10-year average |                         |         |
| Maximum temperature at 2 m                                                 |                         | 0.0004  |
| per unit change                                                            | 1.425 ± 1.103           | 0.0004  |
| Use of laboratory diagnostic examinations in samples of milk               |                         | 0.0006  |
| per unit change                                                            | 2.156 ± 1.245           | 0.0006  |

|                                                                           |               |        |
|---------------------------------------------------------------------------|---------------|--------|
| Temperature at 2 m                                                        |               | 0.001  |
| per unit change                                                           | 0.596 ± 1.171 | 0.001  |
| Collaboration with a veterinarian                                         |               | 0.009  |
| per unit change                                                           | 0.557 ± 1.248 | 0.009  |
| Daily period spent by farmer at the farm                                  |               | 0.015  |
| per unit change                                                           | 1.615 ± 1.216 | 0.015  |
| Temperature range at 2 m                                                  |               | 0.018  |
| per unit change                                                           | 0.806 ± 1.070 | 0.018  |
| <u>Farms with semi-extensive or extensive management</u> – 2-year average |               |        |
| Minimum temperature at 2 m                                                |               | 0.0002 |
| per unit change                                                           | 1.338 ± 1.079 | 0.0002 |
| Temperature at 2 m                                                        |               | 0.0002 |
| per unit change                                                           | 0.591 ± 1.148 | 0.0002 |
| Use of laboratory diagnostic examinations in                              |               | 0.0007 |
| samples of milk                                                           |               |        |
| per unit change                                                           | 2.116 ± 1.243 | 0.0007 |
| Collaboration with a veterinarian                                         |               | 0.002  |
| per unit change                                                           | 0.513 ± 1.242 | 0.002  |
| Wind speed at 10 m                                                        |               | 0.010  |
| per unit change                                                           | 0.448 ± 1.271 | 0.010  |
| Daily period spent by farmer at the farm                                  |               | 0.037  |
| per unit change                                                           | 1.506 ± 1.216 | 0.037  |
| Age of farmers                                                            |               | 0.043  |
| per unit change                                                           | 0.711 ± 1.182 | 0.043  |

1 Odds ratios calculated against the highest prevalence associations of the variable.
